# Supplementary material
Source: ML conference proceedings conference paper supplement (https://openreview.net/forum?id=gvFOB8VCMr)
Supplement: supplementary_material [file rethinking_gnns_and_missing_features_supplementary.pdf › supplementary/rethinking_gnns_and_missing_features_supplementary.pdf]

## A PROOFS

**Theorem 1.** If  $P_{\theta, \gamma, \lambda}$  is feature-MAR and label-MAR, then (2) simplifies to

$$\int_{\mathbf{X}^{miss}} P_{\gamma}(\mathbf{Y}|\mathbf{X}) P_{\theta}(\mathbf{X}^{miss}|\mathbf{X}^{obs}). \quad (6)$$

*Proof.*

$$\begin{aligned} P_{\theta, \gamma, \lambda}(\mathbf{Y}|\mathbf{X}, \mathbf{M}) &= P_{\lambda}(\mathbf{M}|\mathbf{X}, \mathbf{Y}) \frac{P_{\gamma}(\mathbf{Y}|\mathbf{X})}{P_{\gamma, \lambda}(\mathbf{M}|\mathbf{X})} \stackrel{(4)}{=} P_{\gamma}(\mathbf{Y}|\mathbf{X}) \\ P_{\theta, \gamma, \lambda}(\mathbf{X}^{miss}|\mathbf{X}^{obs}, \mathbf{M}) &= P_{\gamma, \lambda}(\mathbf{M}|\mathbf{X}^{obs}, \mathbf{X}^{miss}) \frac{P_{\theta}(\mathbf{X}^{miss}|\mathbf{X}^{obs})}{P_{\theta, \gamma, \lambda}(\mathbf{M}|\mathbf{X}^{obs})} \stackrel{(3)}{=} P_{\theta}(\mathbf{X}^{miss}|\mathbf{X}^{obs}) \end{aligned}$$

□

**Theorem 2.** Let  $\mathbf{X} \in \mathbb{R}^{n \times d}$  and  $\mathbf{Y} \in \mathcal{Y}^n$  be random variables,  $\mathbf{M} \in \{0, 1\}^{n \times d}$  be a missingness mask and  $\mathbf{X}^{obs}$  denotes the observed (incomplete) data. We encode the pair  $(\mathbf{X}^{obs}, \mathbf{M})$  with the random variable  $\tilde{\mathbf{X}}$  with

$$\tilde{X}_{ij} = \begin{cases} X_{ij}, & M_{ij} = 0, \\ ?, & M_{ij} = 1. \end{cases}$$

Let the change in the information be defined as  $\Delta := I(\mathbf{Y}; \tilde{\mathbf{X}}) - I(\mathbf{Y}; \mathbf{X})$ , where  $I(\cdot; \cdot)$  denotes the mutual information. Then,

1. If the missingness is label-MAR, then  $\Delta \leq 0$ .
2. If  $\mathbf{X} \in \{0, 1\}^{n \times d}$  and the missingness is U-MCAR with missingness probability  $\mu$ , and  $s(\mathbf{X})$  is the sample sparsity as in Definition 2, then

$$-nd\mu h_2(\mathbb{E}[s(\mathbf{X})]) \leq \Delta \leq 0,$$

where  $h_2(u) = -u \log u - (1 - u) \log(1 - u)$ .

*Proof.* By construction  $\tilde{\mathbf{X}} = g(\mathbf{X}, \mathbf{M})$  for some measurable  $g$ . Thus  $(\mathbf{Y}) \rightarrow (\mathbf{X}, \mathbf{M}) \rightarrow \tilde{\mathbf{X}}$  is a Markov chain, and the data-processing inequality implies

$$I(\mathbf{Y}; \tilde{\mathbf{X}}) \leq I(\mathbf{Y}; \mathbf{X}, \mathbf{M}). \quad (7)$$

Moreover, for any three random elements  $(A, B, C)$  we have the chain-rule identities

$$I(A; B, C) = I(A; C) + I(A; B | C). \quad (8)$$

**(1) Label-MAR  $\Delta \leq 0$ .** Assume label-MAR:  $\mathbb{P}(\mathbf{M} | \mathbf{X}, \mathbf{Y}) = \mathbb{P}(\mathbf{M} | \mathbf{X})$ , which is equivalent to  $\mathbf{Y} \perp \mathbf{M} | \mathbf{X}$ . Applying equation 8 with  $(A, B, C) = (\mathbf{Y}, \mathbf{X}, \mathbf{M})$ ,

$$I(\mathbf{Y}; \mathbf{X}, \mathbf{M}) = I(\mathbf{Y}; \mathbf{X}) + I(\mathbf{Y}; \mathbf{M} | \mathbf{X}).$$

Under label-MAR,  $I(\mathbf{Y}; \mathbf{M} | \mathbf{X}) = 0$ , hence

$$I(\mathbf{Y}; \mathbf{X}, \mathbf{M}) = I(\mathbf{Y}; \mathbf{X}). \quad (9)$$

Combining equation 7 and equation 9 yields

$$I(\mathbf{Y}; \tilde{\mathbf{X}}) \leq I(\mathbf{Y}; \mathbf{X}) \iff \Delta = I(\mathbf{Y}; \tilde{\mathbf{X}}) - I(\mathbf{Y}; \mathbf{X}) \leq 0.$$

**(2) Two-sided bound under uniform MCAR and  $\alpha$ - $\beta$  sparsity.** Assume uniform MCAR:  $M_{ij} \sim \text{Bernoulli}(1 - \mu)$  independently of  $(\mathbf{X}, \mathbf{Y})$  and i.i.d. across  $(i, j)$ , and that  $\mathbb{P}(s(\mathbf{X}) \geq \alpha) \geq \beta$ , where  $s(\mathbf{X}) = \frac{1}{nd} \sum_{i,j} \mathbb{I}\{X_{ij} = 0\}$ .

*Upper side.* MCAR implies label-MAR, so by part (1):  $\Delta \leq 0$ .

*Lower side.* We start from the chain-rule identity applied to  $(A, B, C) = (\mathbf{Y}, \mathbf{X}, \tilde{\mathbf{X}})$ :

$$I(\mathbf{Y}; \mathbf{X}, \tilde{\mathbf{X}}) = I(\mathbf{Y}; \tilde{\mathbf{X}}) + I(\mathbf{Y}; \mathbf{X} | \tilde{\mathbf{X}}) = I(\mathbf{Y}; \mathbf{X}) + I(\mathbf{Y}; \tilde{\mathbf{X}} | \mathbf{X}).$$

Rearranging gives

$$-\Delta = I(\mathbf{Y}; \mathbf{X}) - I(\mathbf{Y}; \tilde{\mathbf{X}}) = I(\mathbf{Y}; \mathbf{X} | \tilde{\mathbf{X}}) - I(\mathbf{Y}; \tilde{\mathbf{X}} | \mathbf{X}). \quad (10)$$

The second term on the right is nonnegative, hence

$$-\Delta \leq I(\mathbf{Y}; \mathbf{X} | \tilde{\mathbf{X}}). \quad (11)$$

Using the bound  $I(U; V | W) \leq H(V | W)$ , we get

$$-\Delta \leq H(\mathbf{X} | \tilde{\mathbf{X}}). \quad (12)$$

Index the matrix entries by a total order  $\prec$  on pairs  $(i, j)$  and apply the chain rule:

$$H(\mathbf{X} | \tilde{\mathbf{X}}) = \sum_{(i,j)} H(X_{ij} | \tilde{\mathbf{X}}, \{X_{kl} : (k, l) \prec (i, j)\}).$$

Since conditioning reduces entropy,

$$H(\mathbf{X} | \tilde{\mathbf{X}}) \leq \sum_{i,j} H(X_{ij} | \tilde{X}_{ij}). \quad (13)$$

Fix  $(i, j)$  and denote  $\pi_{ij} = \Pr[X_{ij} = 1]$ . Under uniform MCAR,

$$\Pr[\tilde{X}_{ij} = ?] = \mu, \quad \Pr[\tilde{X}_{ij} = x] = (1 - \mu) \Pr[X_{ij} = x], \quad x \in \{0, 1\}.$$

Hence: (i) if  $\tilde{X}_{ij} \in \{0, 1\}$  then  $X_{ij}$  is revealed, so  $H(X_{ij} | \tilde{X}_{ij} \in \{0, 1\}) = 0$ ; (ii) if  $\tilde{X}_{ij} = ?$ , then  $\Pr[X_{ij} = 1 | \tilde{X}_{ij} = ?] = \pi_{ij}$  and  $H(X_{ij} | \tilde{X}_{ij} = ?) = h_2(\pi_{ij})$ . Averaging over  $\tilde{X}_{ij}$  gives

$$H(X_{ij} | \tilde{X}_{ij}) = \mu h_2(\pi_{ij}). \quad (14)$$

Combining equation 13 and equation 14

$$H(\mathbf{X} | \tilde{\mathbf{X}}) \leq \sum_{i,j} \mu h_2(\pi_{ij}) = nd \mu \cdot \frac{1}{nd} \sum_{i,j} h_2(\pi_{ij}) \leq nd \mu \cdot h_2\left(\frac{1}{nd} \sum_{i,j} \pi_{ij}\right),$$

since  $h_2$  is concave. Note that

$$\frac{1}{nd} \sum_{i,j} \pi_{ij} = \frac{1}{nd} \sum_{i,j} \Pr[X_{ij} = 1] = \mathbb{E}\left[\frac{1}{nd} \sum_{i,j} \mathbb{I}\{X_{ij} = 1\}\right] = 1 - \mathbb{E}[s(\mathbf{X})].$$

Using the symmetry  $h_2(u) = h_2(1 - u)$ , we conclude

$$H(\mathbf{X} | \tilde{\mathbf{X}}) \leq nd \mu \cdot h_2(\mathbb{E}[s(\mathbf{X})]).$$

Combining with  $-\Delta \leq H(\mathbf{X} | \tilde{\mathbf{X}})$  gives

$$-nd \mu h_2(\mathbb{E}[s(\mathbf{X})]) \leq \Delta \leq 0.$$

This concludes the proof.  $\square$

## B ADDITIONAL RESULTS ON BENCHMARKS AND PROPOSED DATASETS

This section presents the full plots of the results under the R1 regime introduced in Section 4

Figure 4 shows the complete set of results across all datasets, whose statistics are summarized in Table 3. The top three rows correspond to the classic benchmarks (CORA, CITESEER, PUBMED). Consistently with Proposition 2, models maintain nearly constant F1 scores up to extremely high missingness levels ( $\sim 90\%$ ), confirming that these benchmarks are of limited value for evaluating robustness to missing features.

The bottom four rows correspond to our proposed datasets (SYNTHETIC, AIR, ELECTRIC, TAD-POLE). In these cases, performance degrades much earlier and more severely, highlighting the higher realism and difficulty of our benchmarks.

Table 3: Dataset statistics and feature sparsity. Classic benchmarks (CORA, CITESEER, PUBMED) exhibit extremely sparse bag-of-words features, while our proposed datasets (SYNTHETIC, AIR, ELECTRIC, TADPOLE) provide less sparse representations.

| Dataset   | #Nodes | #Features | Sparsity ↓ | Type of features |
|-----------|--------|-----------|------------|------------------|
| CORA      | 2708   | 1433      | 0.9873     | BoW (binary)     |
| CITESEER  | 3327   | 3703      | 0.9915     | BoW (binary)     |
| PUBMED    | 19717  | 500       | 0.8998     | BoW (binary)     |
| SYNTHETIC | 1000   | 5         | 0.0000     | Gaussian         |
| AIR       | 430    | 7         | 0.1615     | Raw              |
| ELECTRIC  | 2000   | 5         | 0.2000     | Raw              |
| TADPOLE   | 555    | 15        | 0.0000     | Raw              |

## C MORE CHALLENGING DATASETS

In Section 3, we introduced the synthetic and real-world datasets employed in our experiments. We now provide additional details on their construction and characteristics.

**SYNTHETIC** Synthetic dataset based on a Barabási–Albert graph topology. Each node is associated with five real-valued features sampled from a Gaussian distribution. Node labels are generated deterministically by applying a fixed two-layer GCN with hard-coded weights to the complete feature matrix. This construction ensures that the ground-truth labeling function is fully expressible by a GNN, allowing models to achieve near-perfect accuracy in the absence of missingness. The resulting task is a binary node classification problem, with classes separated according to structured feature combinations defined by the fixed GCN. This controlled setup provides a principled testbed to isolate and analyze the effects of different missingness mechanisms, while preserving a well-defined ground truth.

**AIR** Dataset (Zheng et al., 2015) built from a network of air quality monitoring stations deployed in an urban area. Each node corresponds to a station and is associated with a set of environmental measurements. The node features include both air pollutant concentrations ( $\text{CO}$ ,  $\text{NO}_2$ ,  $\text{PM}_{10}$ ,  $\text{O}_3$ ,  $\text{SO}_2$ ) and meteorological variables (temperature, humidity, wind speed, wind direction). Edges are constructed based on the geographical distance between stations, with two nodes connected if their distance is below a given threshold. The target variable is derived from the  $\text{PM}_{2.5}$  concentration, which is discretized into three balanced categories (low, medium, high) according to the distribution of observed values. This formulation allows us to frame the problem as a semi-supervised node classification task with three classes.

**ELECTRIC** Dataset (Birchfield et al., 2016; Baek & Birchfield, 2023) derived from a large-scale model of the Texas power grid. Nodes correspond to buses in the electrical network, each enriched with both structural and operational attributes. The node features include identifiers (area, zone), electrical measurements (voltage magnitude, voltage angle), and a topological property (betweenness centrality). Edges are constructed directly from the transmission lines specified in the raw grid data, connecting pairs of buses. The classification target is the nominal voltage level of each bus (base kV), which we discretize into three categories: low voltage ( $<100$  kV), medium voltage (100–200 kV), and high voltage ( $>200$  kV). This setup results in a three-class node classification problem reflecting operational conditions across the grid.

**TADPOLE** The TADPOLE dataset (Zhu et al., 2019) originates from the TADPOLE challenge, which provides longitudinal clinical and imaging data for patients at risk of developing Alzheimer’s disease. In our graph formulation, each node corresponds to a patient and is associated with a set of features encompassing clinical scores, cerebrospinal fluid (CSF) biomarkers, and neuroimaging measures such as MRI- and PET-derived variables. Since the original dataset does not provide graph connectivity, we construct edges using a  $k$ -nearest neighbors approach over the most informative biomarkers, so that patients with similar profiles are connected. The target variable is the diagnostic label, categorized into three classes (cognitively normal, mild cognitive impairment, Alzheimer’s disease). This results in a semi-supervised node classification problem where the goal is to pre-

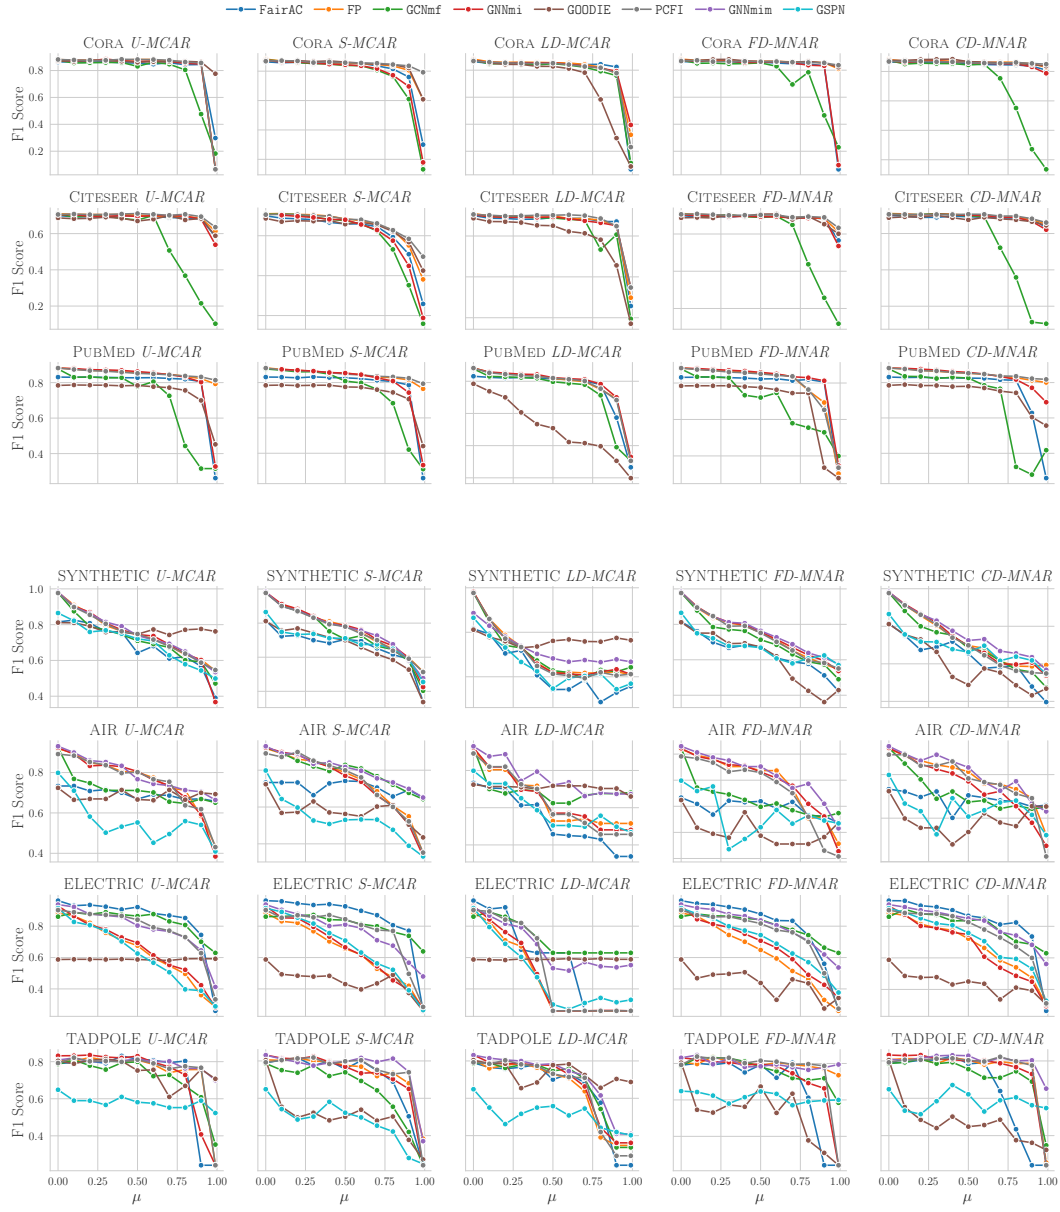

Figure 4: F1 score as a function of feature missingness ( $\mu$ ) for both classic benchmarks (top three rows) and our proposed datasets (bottom four rows), under the mechanisms described in Section 4. Classic benchmarks show almost no degradation until extremely high  $\mu$ , while the proposed datasets reveal model weaknesses at more realistic missingness levels. Tables for numeric results are in App.

dict the diagnostic status of patients based on multimodal biomedical features and patient similarity structure.

Table 3 reports, for each dataset, the number of nodes, number of features, feature sparsity, and the type of features. While the number of nodes and features may seem small compared to standard benchmark graph datasets, we emphasize that using real features (as in AIR, ELECTRIC, and TADPOLE) is more realistic in the context of feature missingness. In fact, it is not meaningful to study missingness on pre-computed embeddings, since embeddings are typically high-dimensional representations mapped to wide feature spaces and are not expected to exhibit missingness in practice.

## D EXPERIMENTAL DETAILS

All baseline and competitor methods are implemented using the official code released in their respective repositories, following the recommended training protocols and hyperparameter settings. For GNNmi and GNNmim, we adopt a standard GNN architecture where the convolutional layer type (Table 4), the number of layers (1-3), the learning rate ( $10^{-4}$ - $10^{-2}$ ), and the weight decay ( $10^{-5}$ - $10^{-3}$ ) are tuned via grid search on the validation set. All models are trained on the same data splits with early stopping to ensure a fair comparison.

Table 4: Best GNN encoder selected within GNNmim for each dataset and missingness mechanism.

| Dataset   | U-MCAR    | S-MCAR    | LD-MCAR   | FD-MNAR   | CD-MNAR   |
|-----------|-----------|-----------|-----------|-----------|-----------|
| SYNTHETIC | GCN       | GCN       | GraphSAGE | GCN       | GCN       |
| AIR       | GraphSAGE | GraphSAGE | GraphSAGE | GraphSAGE | GraphSAGE |
| ELECTRIC  | GIN       | GIN       | GraphSAGE | GIN       | GIN       |
| TADPOLE   | GCN       | GraphSAGE | GraphSAGE | GraphSAGE | GCN       |

## E SCALING THE SYNTHETIC DATASET

In this section, we analyze what happens when either the number of features or the number of nodes in the synthetic dataset is increased. To this end, we constructed three additional synthetic datasets (SYNTHETIC2, SYNTHETIC3, SYNTHETIC4) following the same design principles as SYNTHETIC. Table 5 reports their statistics.

As shown in Figure 5 the behavior of the models in this larger-scale setting is consistent with the one observed in our original setup. In this case, we experimented with the *uniform random missingness* mechanism, and we observe a monotonic decrease in performance for all models as the missingness rate  $\mu$  increases. This confirms that dataset size does not affect the overall trend of performance degradation under feature missingness.

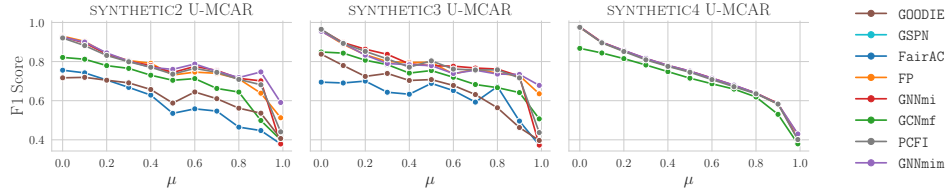

Figure 5: F1 score as a function of feature missingness ( $\mu$ ) for additional synthetic datasets generated with the same procedure as SYNTHETIC, but with either an increased number of nodes or features. For SYNTHETIC4, the FairAC model is not reported since training exceeded the 12-hour time limit, while GOODIE is excluded due to out-of-memory errors.

Table 5: Datasets information.

| Dataset    | #Nodes | #Features | Sparsity ↓ | Type of features |
|------------|--------|-----------|------------|------------------|
| SYNTHETIC  | 1000   | 5         | 0.0000     | Gaussian         |
| SYNTHETIC2 | 1000   | 20        | 0.0000     | Gaussian         |
| SYNTHETIC3 | 1000   | 50        | 0.0000     | Gaussian         |
| SYNTHETIC4 | 50000  | 5         | 0.0000     | Gaussian         |

## F COMPLETE RESULT TABLES – R1 REGIME

Table 6: F1 scores for CORA under mechanism *U-MCAR* and varying  $\mu$  (GSPNis not reported as it is not designed for categorical features).

| $\mu$ | GOODIE                      | FairAC               | FP                          | GNNmi                       | GCNm                 | PCFI                        |
|-------|-----------------------------|----------------------|-----------------------------|-----------------------------|----------------------|-----------------------------|
| 0.00  | 0.875 ( $\pm 0.00$ )        | 0.863 ( $\pm 0.01$ ) | 0.882 ( $\pm 0.00$ )        | 0.873 ( $\pm 0.00$ )        | 0.875 ( $\pm 0.00$ ) | <b>0.882</b> ( $\pm 0.00$ ) |
| 0.10  | 0.867 ( $\pm 0.00$ )        | 0.866 ( $\pm 0.00$ ) | 0.877 ( $\pm 0.00$ )        | 0.876 ( $\pm 0.00$ )        | 0.856 ( $\pm 0.00$ ) | <b>0.878</b> ( $\pm 0.00$ ) |
| 0.20  | 0.875 ( $\pm 0.00$ )        | 0.862 ( $\pm 0.00$ ) | <b>0.878</b> ( $\pm 0.00$ ) | 0.873 ( $\pm 0.00$ )        | 0.858 ( $\pm 0.00$ ) | 0.877 ( $\pm 0.00$ )        |
| 0.30  | 0.873 ( $\pm 0.00$ )        | 0.865 ( $\pm 0.00$ ) | 0.881 ( $\pm 0.00$ )        | <b>0.885</b> ( $\pm 0.00$ ) | 0.860 ( $\pm 0.00$ ) | 0.876 ( $\pm 0.00$ )        |
| 0.40  | 0.869 ( $\pm 0.00$ )        | 0.857 ( $\pm 0.00$ ) | 0.878 ( $\pm 0.00$ )        | 0.873 ( $\pm 0.00$ )        | 0.860 ( $\pm 0.00$ ) | <b>0.884</b> ( $\pm 0.00$ ) |
| 0.50  | 0.861 ( $\pm 0.00$ )        | 0.856 ( $\pm 0.00$ ) | <b>0.882</b> ( $\pm 0.00$ ) | 0.867 ( $\pm 0.00$ )        | 0.831 ( $\pm 0.00$ ) | 0.882 ( $\pm 0.00$ )        |
| 0.60  | 0.866 ( $\pm 0.00$ )        | 0.847 ( $\pm 0.00$ ) | <b>0.882</b> ( $\pm 0.00$ ) | 0.871 ( $\pm 0.00$ )        | 0.862 ( $\pm 0.00$ ) | 0.881 ( $\pm 0.00$ )        |
| 0.70  | 0.866 ( $\pm 0.00$ )        | 0.858 ( $\pm 0.00$ ) | 0.869 ( $\pm 0.00$ )        | 0.865 ( $\pm 0.00$ )        | 0.847 ( $\pm 0.00$ ) | <b>0.877</b> ( $\pm 0.00$ ) |
| 0.80  | <b>0.868</b> ( $\pm 0.00$ ) | 0.843 ( $\pm 0.00$ ) | 0.864 ( $\pm 0.00$ )        | 0.854 ( $\pm 0.00$ )        | 0.805 ( $\pm 0.00$ ) | 0.863 ( $\pm 0.00$ )        |
| 0.90  | <b>0.864</b> ( $\pm 0.00$ ) | 0.845 ( $\pm 0.00$ ) | 0.860 ( $\pm 0.00$ )        | 0.848 ( $\pm 0.00$ )        | 0.476 ( $\pm 0.00$ ) | 0.856 ( $\pm 0.00$ )        |
| 0.99  | <b>0.776</b> ( $\pm 0.00$ ) | 0.298 ( $\pm 0.00$ ) | 0.066 ( $\pm 0.00$ )        | 0.066 ( $\pm 0.00$ )        | 0.183 ( $\pm 0.00$ ) | 0.065 ( $\pm 0.00$ )        |

Table 7: F1 scores for CORA under mechanism *S-MCAR* and varying  $\mu$  (GSPNis not reported as it is not designed for categorical features).

| $\mu$ | GOODIE                      | FairAC               | FP                          | GNNmi                | GCNm                 | PCFI                        |
|-------|-----------------------------|----------------------|-----------------------------|----------------------|----------------------|-----------------------------|
| 0.00  | 0.875 ( $\pm 0.00$ )        | 0.863 ( $\pm 0.01$ ) | <b>0.882</b> ( $\pm 0.00$ ) | 0.872 ( $\pm 0.00$ ) | 0.875 ( $\pm 0.00$ ) | 0.868 ( $\pm 0.00$ )        |
| 0.10  | 0.868 ( $\pm 0.00$ )        | 0.857 ( $\pm 0.00$ ) | 0.869 ( $\pm 0.00$ )        | 0.862 ( $\pm 0.00$ ) | 0.869 ( $\pm 0.00$ ) | <b>0.872</b> ( $\pm 0.00$ ) |
| 0.20  | <b>0.872</b> ( $\pm 0.00$ ) | 0.860 ( $\pm 0.00$ ) | 0.863 ( $\pm 0.00$ )        | 0.863 ( $\pm 0.00$ ) | 0.858 ( $\pm 0.00$ ) | 0.869 ( $\pm 0.00$ )        |
| 0.30  | <b>0.865</b> ( $\pm 0.00$ ) | 0.850 ( $\pm 0.00$ ) | 0.854 ( $\pm 0.00$ )        | 0.855 ( $\pm 0.00$ ) | 0.852 ( $\pm 0.00$ ) | 0.858 ( $\pm 0.00$ )        |
| 0.40  | <b>0.870</b> ( $\pm 0.00$ ) | 0.857 ( $\pm 0.00$ ) | 0.859 ( $\pm 0.00$ )        | 0.848 ( $\pm 0.00$ ) | 0.848 ( $\pm 0.00$ ) | 0.862 ( $\pm 0.00$ )        |
| 0.50  | <b>0.862</b> ( $\pm 0.00$ ) | 0.854 ( $\pm 0.00$ ) | 0.854 ( $\pm 0.00$ )        | 0.844 ( $\pm 0.00$ ) | 0.839 ( $\pm 0.00$ ) | 0.858 ( $\pm 0.00$ )        |
| 0.60  | 0.855 ( $\pm 0.00$ )        | 0.854 ( $\pm 0.00$ ) | 0.853 ( $\pm 0.00$ )        | 0.837 ( $\pm 0.00$ ) | 0.837 ( $\pm 0.00$ ) | <b>0.856</b> ( $\pm 0.00$ ) |
| 0.70  | 0.847 ( $\pm 0.00$ )        | 0.836 ( $\pm 0.00$ ) | 0.845 ( $\pm 0.00$ )        | 0.817 ( $\pm 0.00$ ) | 0.807 ( $\pm 0.00$ ) | <b>0.854</b> ( $\pm 0.00$ ) |
| 0.80  | <b>0.845</b> ( $\pm 0.00$ ) | 0.815 ( $\pm 0.00$ ) | 0.836 ( $\pm 0.00$ )        | 0.772 ( $\pm 0.00$ ) | 0.764 ( $\pm 0.00$ ) | 0.845 ( $\pm 0.00$ )        |
| 0.90  | 0.822 ( $\pm 0.00$ )        | 0.760 ( $\pm 0.00$ ) | 0.806 ( $\pm 0.00$ )        | 0.696 ( $\pm 0.00$ ) | 0.610 ( $\pm 0.00$ ) | <b>0.836</b> ( $\pm 0.00$ ) |
| 0.99  | 0.609 ( $\pm 0.00$ )        | 0.300 ( $\pm 0.00$ ) | 0.606 ( $\pm 0.00$ )        | 0.179 ( $\pm 0.00$ ) | 0.132 ( $\pm 0.00$ ) | <b>0.792</b> ( $\pm 0.00$ ) |

Table 8: F1 scores for CORA under mechanism *LD-MCAR* and varying  $\mu$  (GSPNis not reported as it is not designed for categorical features).

| $\mu$ | GOODIE               | FairAC                      | FP                          | GNNmi                       | GCNm                 | PCFI                 |
|-------|----------------------|-----------------------------|-----------------------------|-----------------------------|----------------------|----------------------|
| 0.00  | 0.875 ( $\pm 0.00$ ) | 0.863 ( $\pm 0.01$ )        | <b>0.882</b> ( $\pm 0.00$ ) | 0.873 ( $\pm 0.00$ )        | 0.875 ( $\pm 0.00$ ) | 0.868 ( $\pm 0.00$ ) |
| 0.10  | 0.852 ( $\pm 0.00$ ) | 0.851 ( $\pm 0.00$ )        | <b>0.862</b> ( $\pm 0.00$ ) | 0.857 ( $\pm 0.00$ )        | 0.846 ( $\pm 0.00$ ) | 0.860 ( $\pm 0.00$ ) |
| 0.20  | 0.843 ( $\pm 0.00$ ) | 0.854 ( $\pm 0.00$ )        | <b>0.859</b> ( $\pm 0.00$ ) | 0.854 ( $\pm 0.00$ )        | 0.850 ( $\pm 0.00$ ) | 0.855 ( $\pm 0.00$ ) |
| 0.30  | 0.843 ( $\pm 0.00$ ) | 0.856 ( $\pm 0.00$ )        | <b>0.859</b> ( $\pm 0.00$ ) | 0.855 ( $\pm 0.00$ )        | 0.846 ( $\pm 0.00$ ) | 0.852 ( $\pm 0.00$ ) |
| 0.40  | 0.828 ( $\pm 0.00$ ) | 0.854 ( $\pm 0.00$ )        | <b>0.858</b> ( $\pm 0.00$ ) | 0.853 ( $\pm 0.00$ )        | 0.838 ( $\pm 0.00$ ) | 0.849 ( $\pm 0.00$ ) |
| 0.50  | 0.828 ( $\pm 0.00$ ) | 0.854 ( $\pm 0.00$ )        | 0.855 ( $\pm 0.00$ )        | <b>0.855</b> ( $\pm 0.00$ ) | 0.848 ( $\pm 0.00$ ) | 0.852 ( $\pm 0.00$ ) |
| 0.60  | 0.812 ( $\pm 0.00$ ) | 0.847 ( $\pm 0.00$ )        | <b>0.853</b> ( $\pm 0.00$ ) | 0.844 ( $\pm 0.00$ )        | 0.837 ( $\pm 0.00$ ) | 0.841 ( $\pm 0.00$ ) |
| 0.70  | 0.782 ( $\pm 0.00$ ) | 0.841 ( $\pm 0.00$ )        | <b>0.842</b> ( $\pm 0.00$ ) | 0.831 ( $\pm 0.00$ )        | 0.822 ( $\pm 0.00$ ) | 0.827 ( $\pm 0.00$ ) |
| 0.80  | 0.584 ( $\pm 0.00$ ) | <b>0.844</b> ( $\pm 0.00$ ) | 0.822 ( $\pm 0.00$ )        | 0.815 ( $\pm 0.00$ )        | 0.792 ( $\pm 0.00$ ) | 0.818 ( $\pm 0.00$ ) |
| 0.90  | 0.297 ( $\pm 0.00$ ) | <b>0.824</b> ( $\pm 0.00$ ) | 0.777 ( $\pm 0.00$ )        | 0.793 ( $\pm 0.00$ )        | 0.760 ( $\pm 0.00$ ) | 0.778 ( $\pm 0.00$ ) |
| 0.99  | 0.088 ( $\pm 0.00$ ) | 0.066 ( $\pm 0.00$ )        | 0.322 ( $\pm 0.00$ )        | <b>0.395</b> ( $\pm 0.00$ ) | 0.113 ( $\pm 0.00$ ) | 0.231 ( $\pm 0.00$ ) |

Table 9: F1 scores for CORA under mechanism *FD-MNAR* and varying  $\mu$  (GSPNis not reported as it is not designed for categorical features).

| $\mu$ | GOODIE                      | FairAC               | FP                          | GNNmi                | GCNm                 | PCFI                        |
|-------|-----------------------------|----------------------|-----------------------------|----------------------|----------------------|-----------------------------|
| 0.00  | 0.875 ( $\pm 0.00$ )        | 0.863 ( $\pm 0.01$ ) | <b>0.882</b> ( $\pm 0.00$ ) | 0.873 ( $\pm 0.00$ ) | 0.875 ( $\pm 0.00$ ) | 0.868 ( $\pm 0.00$ )        |
| 0.10  | 0.872 ( $\pm 0.01$ )        | 0.862 ( $\pm 0.01$ ) | <b>0.873</b> ( $\pm 0.01$ ) | 0.868 ( $\pm 0.01$ ) | 0.851 ( $\pm 0.01$ ) | 0.873 ( $\pm 0.00$ )        |
| 0.20  | <b>0.879</b> ( $\pm 0.00$ ) | 0.870 ( $\pm 0.01$ ) | 0.874 ( $\pm 0.00$ )        | 0.865 ( $\pm 0.01$ ) | 0.853 ( $\pm 0.01$ ) | 0.863 ( $\pm 0.01$ )        |
| 0.30  | <b>0.880</b> ( $\pm 0.00$ ) | 0.864 ( $\pm 0.01$ ) | 0.869 ( $\pm 0.00$ )        | 0.867 ( $\pm 0.01$ ) | 0.847 ( $\pm 0.01$ ) | 0.864 ( $\pm 0.01$ )        |
| 0.40  | <b>0.869</b> ( $\pm 0.01$ ) | 0.855 ( $\pm 0.01$ ) | 0.864 ( $\pm 0.01$ )        | 0.856 ( $\pm 0.01$ ) | 0.849 ( $\pm 0.00$ ) | 0.866 ( $\pm 0.01$ )        |
| 0.50  | 0.865 ( $\pm 0.01$ )        | 0.860 ( $\pm 0.01$ ) | <b>0.866</b> ( $\pm 0.01$ ) | 0.859 ( $\pm 0.01$ ) | 0.854 ( $\pm 0.01$ ) | 0.863 ( $\pm 0.01$ )        |
| 0.60  | <b>0.866</b> ( $\pm 0.01$ ) | 0.853 ( $\pm 0.01$ ) | 0.865 ( $\pm 0.01$ )        | 0.863 ( $\pm 0.01$ ) | 0.829 ( $\pm 0.02$ ) | 0.864 ( $\pm 0.01$ )        |
| 0.70  | 0.859 ( $\pm 0.01$ )        | 0.847 ( $\pm 0.00$ ) | <b>0.862</b> ( $\pm 0.01$ ) | 0.853 ( $\pm 0.00$ ) | 0.695 ( $\pm 0.14$ ) | 0.860 ( $\pm 0.00$ )        |
| 0.80  | <b>0.865</b> ( $\pm 0.01$ ) | 0.845 ( $\pm 0.01$ ) | 0.861 ( $\pm 0.01$ )        | 0.837 ( $\pm 0.00$ ) | 0.785 ( $\pm 0.05$ ) | 0.857 ( $\pm 0.01$ )        |
| 0.90  | 0.854 ( $\pm 0.01$ )        | 0.833 ( $\pm 0.01$ ) | <b>0.855</b> ( $\pm 0.00$ ) | 0.833 ( $\pm 0.00$ ) | 0.465 ( $\pm 0.21$ ) | 0.854 ( $\pm 0.01$ )        |
| 0.99  | 0.822 ( $\pm 0.01$ )        | 0.066 ( $\pm 0.00$ ) | 0.810 ( $\pm 0.02$ )        | 0.098 ( $\pm 0.01$ ) | 0.230 ( $\pm 0.05$ ) | <b>0.837</b> ( $\pm 0.02$ ) |

Table 10: F1 scores for CORA under mechanism *CD-MNAR* and varying  $\mu$  (GSPNis not reported as it is not designed for categorical features).

| $\mu$ | GOODIE                      | FairAC               | FP                          | GNNmi                | GCNm                 | PCFI                        |
|-------|-----------------------------|----------------------|-----------------------------|----------------------|----------------------|-----------------------------|
| 0.00  | 0.875 ( $\pm 0.00$ )        | 0.863 ( $\pm 0.01$ ) | <b>0.882</b> ( $\pm 0.00$ ) | 0.873 ( $\pm 0.00$ ) | 0.875 ( $\pm 0.00$ ) | 0.868 ( $\pm 0.00$ )        |
| 0.10  | <b>0.875</b> ( $\pm 0.00$ ) | 0.864 ( $\pm 0.01$ ) | 0.870 ( $\pm 0.01$ )        | 0.862 ( $\pm 0.01$ ) | 0.850 ( $\pm 0.00$ ) | 0.869 ( $\pm 0.01$ )        |
| 0.20  | <b>0.881</b> ( $\pm 0.01$ ) | 0.865 ( $\pm 0.00$ ) | 0.874 ( $\pm 0.01$ )        | 0.868 ( $\pm 0.01$ ) | 0.856 ( $\pm 0.01$ ) | 0.869 ( $\pm 0.01$ )        |
| 0.30  | <b>0.882</b> ( $\pm 0.00$ ) | 0.858 ( $\pm 0.00$ ) | 0.873 ( $\pm 0.00$ )        | 0.871 ( $\pm 0.01$ ) | 0.854 ( $\pm 0.00$ ) | 0.866 ( $\pm 0.01$ )        |
| 0.40  | <b>0.884</b> ( $\pm 0.01$ ) | 0.862 ( $\pm 0.01$ ) | 0.870 ( $\pm 0.00$ )        | 0.864 ( $\pm 0.00$ ) | 0.853 ( $\pm 0.01$ ) | 0.865 ( $\pm 0.01$ )        |
| 0.50  | 0.867 ( $\pm 0.01$ )        | 0.852 ( $\pm 0.01$ ) | <b>0.867</b> ( $\pm 0.00$ ) | 0.861 ( $\pm 0.00$ ) | 0.844 ( $\pm 0.02$ ) | 0.861 ( $\pm 0.01$ )        |
| 0.60  | <b>0.864</b> ( $\pm 0.00$ ) | 0.847 ( $\pm 0.00$ ) | 0.860 ( $\pm 0.01$ )        | 0.856 ( $\pm 0.01$ ) | 0.849 ( $\pm 0.00$ ) | 0.857 ( $\pm 0.00$ )        |
| 0.70  | 0.860 ( $\pm 0.01$ )        | 0.845 ( $\pm 0.01$ ) | <b>0.864</b> ( $\pm 0.01$ ) | 0.852 ( $\pm 0.01$ ) | 0.753 ( $\pm 0.12$ ) | 0.856 ( $\pm 0.01$ )        |
| 0.80  | 0.853 ( $\pm 0.01$ )        | 0.844 ( $\pm 0.02$ ) | <b>0.862</b> ( $\pm 0.01$ ) | 0.852 ( $\pm 0.01$ ) | 0.551 ( $\pm 0.10$ ) | 0.861 ( $\pm 0.01$ )        |
| 0.90  | 0.848 ( $\pm 0.01$ )        | 0.835 ( $\pm 0.01$ ) | 0.852 ( $\pm 0.00$ )        | 0.831 ( $\pm 0.01$ ) | 0.271 ( $\pm 0.23$ ) | <b>0.855</b> ( $\pm 0.01$ ) |
| 0.99  | 0.836 ( $\pm 0.01$ )        | 0.810 ( $\pm 0.01$ ) | 0.828 ( $\pm 0.01$ )        | 0.788 ( $\pm 0.02$ ) | 0.135 ( $\pm 0.05$ ) | <b>0.849</b> ( $\pm 0.01$ ) |

Table 11: F1 scores for CITESEER under mechanism *U-MCAR* and varying  $\mu$  (GSPNis not reported as it is not designed for categorical features).

| $\mu$ | GOODIE               | FairAC               | FP                          | GNNmi                | GCNm                 | PCFI                        |
|-------|----------------------|----------------------|-----------------------------|----------------------|----------------------|-----------------------------|
| 0.00  | 0.687 ( $\pm 0.00$ ) | 0.700 ( $\pm 0.00$ ) | <b>0.710</b> ( $\pm 0.02$ ) | 0.704 ( $\pm 0.02$ ) | 0.707 ( $\pm 0.00$ ) | 0.706 ( $\pm 0.02$ )        |
| 0.10  | 0.682 ( $\pm 0.00$ ) | 0.693 ( $\pm 0.00$ ) | 0.707 ( $\pm 0.00$ )        | 0.705 ( $\pm 0.00$ ) | 0.692 ( $\pm 0.00$ ) | <b>0.708</b> ( $\pm 0.00$ ) |
| 0.20  | 0.684 ( $\pm 0.00$ ) | 0.693 ( $\pm 0.00$ ) | <b>0.706</b> ( $\pm 0.00$ ) | 0.695 ( $\pm 0.00$ ) | 0.698 ( $\pm 0.00$ ) | 0.705 ( $\pm 0.00$ )        |
| 0.30  | 0.691 ( $\pm 0.00$ ) | 0.691 ( $\pm 0.00$ ) | 0.705 ( $\pm 0.00$ )        | 0.696 ( $\pm 0.00$ ) | 0.697 ( $\pm 0.00$ ) | <b>0.706</b> ( $\pm 0.00$ ) |
| 0.40  | 0.685 ( $\pm 0.00$ ) | 0.700 ( $\pm 0.00$ ) | 0.706 ( $\pm 0.00$ )        | 0.698 ( $\pm 0.00$ ) | 0.684 ( $\pm 0.00$ ) | <b>0.708</b> ( $\pm 0.00$ ) |
| 0.50  | 0.669 ( $\pm 0.00$ ) | 0.697 ( $\pm 0.00$ ) | 0.702 ( $\pm 0.00$ )        | 0.695 ( $\pm 0.00$ ) | 0.675 ( $\pm 0.00$ ) | <b>0.711</b> ( $\pm 0.00$ ) |
| 0.60  | 0.680 ( $\pm 0.00$ ) | 0.695 ( $\pm 0.00$ ) | 0.697 ( $\pm 0.00$ )        | 0.699 ( $\pm 0.00$ ) | 0.700 ( $\pm 0.00$ ) | <b>0.707</b> ( $\pm 0.00$ ) |
| 0.70  | 0.699 ( $\pm 0.00$ ) | 0.688 ( $\pm 0.00$ ) | 0.694 ( $\pm 0.00$ )        | 0.700 ( $\pm 0.00$ ) | 0.507 ( $\pm 0.00$ ) | <b>0.701</b> ( $\pm 0.00$ ) |
| 0.80  | 0.675 ( $\pm 0.00$ ) | 0.687 ( $\pm 0.00$ ) | 0.694 ( $\pm 0.00$ )        | 0.696 ( $\pm 0.00$ ) | 0.368 ( $\pm 0.00$ ) | <b>0.707</b> ( $\pm 0.00$ ) |
| 0.90  | 0.684 ( $\pm 0.00$ ) | 0.680 ( $\pm 0.00$ ) | 0.686 ( $\pm 0.00$ )        | 0.680 ( $\pm 0.00$ ) | 0.215 ( $\pm 0.00$ ) | <b>0.694</b> ( $\pm 0.00$ ) |
| 0.99  | 0.588 ( $\pm 0.00$ ) | 0.584 ( $\pm 0.00$ ) | 0.613 ( $\pm 0.00$ )        | 0.539 ( $\pm 0.00$ ) | 0.102 ( $\pm 0.00$ ) | <b>0.636</b> ( $\pm 0.00$ ) |

Table 12: F1 scores for CITESEER under mechanism *S-MCAR* and varying  $\mu$  (GSPNis not reported as it is not designed for categorical features).

| $\mu$ | GOODIE               | FairAC               | FP                          | GNNmi                | GCNmf                | PCFI                        |
|-------|----------------------|----------------------|-----------------------------|----------------------|----------------------|-----------------------------|
| 0.00  | 0.687 ( $\pm 0.00$ ) | 0.700 ( $\pm 0.00$ ) | <b>0.710</b> ( $\pm 0.02$ ) | -                    | 0.707 ( $\pm 0.00$ ) | 0.706 ( $\pm 0.02$ )        |
| 0.10  | 0.670 ( $\pm 0.00$ ) | 0.688 ( $\pm 0.00$ ) | <b>0.711</b> ( $\pm 0.00$ ) | 0.703 ( $\pm 0.00$ ) | 0.708 ( $\pm 0.00$ ) | 0.708 ( $\pm 0.00$ )        |
| 0.20  | 0.675 ( $\pm 0.00$ ) | 0.685 ( $\pm 0.00$ ) | <b>0.707</b> ( $\pm 0.00$ ) | 0.697 ( $\pm 0.00$ ) | 0.707 ( $\pm 0.00$ ) | 0.706 ( $\pm 0.00$ )        |
| 0.30  | 0.673 ( $\pm 0.00$ ) | 0.681 ( $\pm 0.00$ ) | <b>0.705</b> ( $\pm 0.00$ ) | 0.692 ( $\pm 0.00$ ) | 0.693 ( $\pm 0.00$ ) | 0.701 ( $\pm 0.00$ )        |
| 0.40  | 0.677 ( $\pm 0.00$ ) | 0.667 ( $\pm 0.00$ ) | <b>0.698</b> ( $\pm 0.00$ ) | 0.682 ( $\pm 0.00$ ) | 0.682 ( $\pm 0.00$ ) | 0.698 ( $\pm 0.00$ )        |
| 0.50  | 0.658 ( $\pm 0.00$ ) | 0.659 ( $\pm 0.00$ ) | <b>0.685</b> ( $\pm 0.00$ ) | 0.680 ( $\pm 0.00$ ) | 0.676 ( $\pm 0.00$ ) | 0.683 ( $\pm 0.00$ )        |
| 0.60  | 0.667 ( $\pm 0.00$ ) | 0.659 ( $\pm 0.00$ ) | 0.676 ( $\pm 0.00$ )        | 0.656 ( $\pm 0.00$ ) | 0.659 ( $\pm 0.00$ ) | <b>0.680</b> ( $\pm 0.00$ ) |
| 0.70  | 0.655 ( $\pm 0.00$ ) | 0.646 ( $\pm 0.00$ ) | 0.656 ( $\pm 0.00$ )        | 0.629 ( $\pm 0.00$ ) | 0.624 ( $\pm 0.00$ ) | <b>0.662</b> ( $\pm 0.00$ ) |
| 0.80  | 0.621 ( $\pm 0.00$ ) | 0.593 ( $\pm 0.00$ ) | <b>0.629</b> ( $\pm 0.00$ ) | 0.575 ( $\pm 0.00$ ) | 0.531 ( $\pm 0.00$ ) | 0.628 ( $\pm 0.00$ )        |
| 0.90  | 0.568 ( $\pm 0.00$ ) | 0.508 ( $\pm 0.00$ ) | 0.552 ( $\pm 0.00$ )        | 0.449 ( $\pm 0.00$ ) | 0.352 ( $\pm 0.00$ ) | <b>0.584</b> ( $\pm 0.00$ ) |
| 0.99  | 0.425 ( $\pm 0.00$ ) | 0.258 ( $\pm 0.00$ ) | 0.381 ( $\pm 0.00$ )        | 0.188 ( $\pm 0.00$ ) | 0.159 ( $\pm 0.00$ ) | <b>0.495</b> ( $\pm 0.00$ ) |

Table 13: F1 scores for CITESEER under mechanism *LD-MCAR* and varying  $\mu$  (GSPNis not reported as it is not designed for categorical features).

| $\mu$ | GOODIE               | FairAC                      | FP                          | GNNmi                | GCNmf                | PCFI                        |
|-------|----------------------|-----------------------------|-----------------------------|----------------------|----------------------|-----------------------------|
| 0.00  | 0.687 ( $\pm 0.00$ ) | 0.700 ( $\pm 0.00$ )        | <b>0.710</b> ( $\pm 0.02$ ) | 0.704 ( $\pm 0.02$ ) | 0.707 ( $\pm 0.00$ ) | 0.706 ( $\pm 0.02$ )        |
| 0.10  | 0.671 ( $\pm 0.00$ ) | 0.687 ( $\pm 0.00$ )        | 0.698 ( $\pm 0.00$ )        | 0.694 ( $\pm 0.00$ ) | 0.693 ( $\pm 0.00$ ) | <b>0.702</b> ( $\pm 0.00$ ) |
| 0.20  | 0.670 ( $\pm 0.00$ ) | 0.686 ( $\pm 0.00$ )        | <b>0.699</b> ( $\pm 0.00$ ) | 0.691 ( $\pm 0.00$ ) | 0.696 ( $\pm 0.00$ ) | 0.698 ( $\pm 0.00$ )        |
| 0.30  | 0.666 ( $\pm 0.00$ ) | 0.682 ( $\pm 0.00$ )        | 0.697 ( $\pm 0.00$ )        | 0.691 ( $\pm 0.00$ ) | 0.694 ( $\pm 0.00$ ) | <b>0.699</b> ( $\pm 0.00$ ) |
| 0.40  | 0.652 ( $\pm 0.00$ ) | 0.683 ( $\pm 0.00$ )        | 0.698 ( $\pm 0.00$ )        | 0.691 ( $\pm 0.00$ ) | 0.688 ( $\pm 0.00$ ) | <b>0.701</b> ( $\pm 0.00$ ) |
| 0.50  | 0.650 ( $\pm 0.00$ ) | 0.690 ( $\pm 0.00$ )        | 0.699 ( $\pm 0.00$ )        | 0.693 ( $\pm 0.00$ ) | 0.688 ( $\pm 0.00$ ) | <b>0.702</b> ( $\pm 0.00$ ) |
| 0.60  | 0.622 ( $\pm 0.00$ ) | 0.686 ( $\pm 0.00$ )        | 0.685 ( $\pm 0.00$ )        | 0.685 ( $\pm 0.00$ ) | 0.681 ( $\pm 0.00$ ) | <b>0.704</b> ( $\pm 0.00$ ) |
| 0.70  | 0.613 ( $\pm 0.00$ ) | 0.687 ( $\pm 0.00$ )        | 0.686 ( $\pm 0.00$ )        | 0.674 ( $\pm 0.00$ ) | 0.677 ( $\pm 0.00$ ) | <b>0.700</b> ( $\pm 0.00$ ) |
| 0.80  | 0.582 ( $\pm 0.00$ ) | 0.671 ( $\pm 0.00$ )        | 0.677 ( $\pm 0.00$ )        | 0.664 ( $\pm 0.00$ ) | 0.534 ( $\pm 0.00$ ) | <b>0.686</b> ( $\pm 0.00$ ) |
| 0.90  | 0.456 ( $\pm 0.00$ ) | <b>0.671</b> ( $\pm 0.00$ ) | 0.650 ( $\pm 0.00$ )        | 0.650 ( $\pm 0.00$ ) | 0.607 ( $\pm 0.00$ ) | 0.648 ( $\pm 0.00$ )        |
| 0.99  | 0.171 ( $\pm 0.00$ ) | 0.257 ( $\pm 0.00$ )        | 0.298 ( $\pm 0.00$ )        | 0.346 ( $\pm 0.00$ ) | 0.195 ( $\pm 0.00$ ) | <b>0.348</b> ( $\pm 0.00$ ) |

Table 14: F1 scores for CITESEER under mechanism *FD-MNAR* and varying  $\mu$  (GSPNis not reported as it is not designed for categorical features).

| $\mu$ | GOODIE                      | FairAC               | FP                          | GNNmi                | GCNmf                       | PCFI                        |
|-------|-----------------------------|----------------------|-----------------------------|----------------------|-----------------------------|-----------------------------|
| 0.00  | 0.687 ( $\pm 0.00$ )        | 0.700 ( $\pm 0.00$ ) | <b>0.710</b> ( $\pm 0.02$ ) | 0.704 ( $\pm 0.02$ ) | 0.707 ( $\pm 0.00$ )        | 0.706 ( $\pm 0.02$ )        |
| 0.10  | 0.689 ( $\pm 0.03$ )        | 0.691 ( $\pm 0.03$ ) | 0.706 ( $\pm 0.02$ )        | 0.699 ( $\pm 0.02$ ) | 0.699 ( $\pm 0.02$ )        | <b>0.708</b> ( $\pm 0.03$ ) |
| 0.20  | 0.686 ( $\pm 0.02$ )        | 0.698 ( $\pm 0.03$ ) | 0.703 ( $\pm 0.02$ )        | 0.697 ( $\pm 0.02$ ) | 0.696 ( $\pm 0.02$ )        | <b>0.704</b> ( $\pm 0.02$ ) |
| 0.30  | 0.701 ( $\pm 0.04$ )        | 0.690 ( $\pm 0.03$ ) | 0.701 ( $\pm 0.03$ )        | 0.693 ( $\pm 0.02$ ) | <b>0.704</b> ( $\pm 0.02$ ) | 0.700 ( $\pm 0.03$ )        |
| 0.40  | 0.696 ( $\pm 0.04$ )        | 0.699 ( $\pm 0.04$ ) | 0.695 ( $\pm 0.02$ )        | 0.695 ( $\pm 0.02$ ) | 0.692 ( $\pm 0.03$ )        | <b>0.701</b> ( $\pm 0.03$ ) |
| 0.50  | <b>0.707</b> ( $\pm 0.03$ ) | 0.688 ( $\pm 0.04$ ) | 0.698 ( $\pm 0.03$ )        | 0.693 ( $\pm 0.03$ ) | 0.690 ( $\pm 0.02$ )        | 0.702 ( $\pm 0.03$ )        |
| 0.60  | <b>0.708</b> ( $\pm 0.02$ ) | 0.694 ( $\pm 0.03$ ) | 0.691 ( $\pm 0.03$ )        | 0.693 ( $\pm 0.03$ ) | 0.696 ( $\pm 0.02$ )        | 0.702 ( $\pm 0.03$ )        |
| 0.70  | 0.678 ( $\pm 0.04$ )        | 0.688 ( $\pm 0.03$ ) | 0.688 ( $\pm 0.03$ )        | 0.686 ( $\pm 0.02$ ) | 0.649 ( $\pm 0.03$ )        | <b>0.690</b> ( $\pm 0.04$ ) |
| 0.80  | <b>0.695</b> ( $\pm 0.03$ ) | 0.689 ( $\pm 0.04$ ) | 0.689 ( $\pm 0.02$ )        | 0.685 ( $\pm 0.02$ ) | 0.437 ( $\pm 0.27$ )        | 0.694 ( $\pm 0.03$ )        |
| 0.90  | 0.653 ( $\pm 0.03$ )        | 0.681 ( $\pm 0.04$ ) | 0.682 ( $\pm 0.02$ )        | 0.687 ( $\pm 0.03$ ) | 0.257 ( $\pm 0.17$ )        | <b>0.689</b> ( $\pm 0.02$ ) |
| 0.99  | 0.601 ( $\pm 0.01$ )        | 0.566 ( $\pm 0.01$ ) | 0.611 ( $\pm 0.01$ )        | 0.535 ( $\pm 0.02$ ) | 0.118 ( $\pm 0.04$ )        | <b>0.633</b> ( $\pm 0.01$ ) |



Table 15: F1 scores for CITESEER under mechanism *CD-MNAR* and varying  $\mu$  (GSPNis not reported as it is not designed for categorical features).

| $\mu$ | GOODIE               | FairAC                      | FP                          | GNNmi                | GCNm                        | PCFI                        |
|-------|----------------------|-----------------------------|-----------------------------|----------------------|-----------------------------|-----------------------------|
| 0.00  | 0.687 ( $\pm 0.00$ ) | 0.700 ( $\pm 0.05$ )        | <b>0.710</b> ( $\pm 0.02$ ) | 0.704 ( $\pm 0.02$ ) | 0.707 ( $\pm 0.00$ )        | 0.706 ( $\pm 0.02$ )        |
| 0.10  | 0.692 ( $\pm 0.04$ ) | 0.696 ( $\pm 0.04$ )        | <b>0.708</b> ( $\pm 0.02$ ) | 0.705 ( $\pm 0.02$ ) | 0.702 ( $\pm 0.03$ )        | 0.705 ( $\pm 0.02$ )        |
| 0.20  | 0.690 ( $\pm 0.04$ ) | 0.689 ( $\pm 0.04$ )        | 0.703 ( $\pm 0.03$ )        | 0.702 ( $\pm 0.02$ ) | <b>0.705</b> ( $\pm 0.02$ ) | 0.704 ( $\pm 0.02$ )        |
| 0.30  | 0.700 ( $\pm 0.02$ ) | 0.689 ( $\pm 0.04$ )        | 0.708 ( $\pm 0.03$ )        | 0.706 ( $\pm 0.02$ ) | <b>0.708</b> ( $\pm 0.02$ ) | 0.705 ( $\pm 0.02$ )        |
| 0.40  | 0.687 ( $\pm 0.04$ ) | 0.695 ( $\pm 0.04$ )        | <b>0.707</b> ( $\pm 0.03$ ) | 0.704 ( $\pm 0.02$ ) | 0.703 ( $\pm 0.03$ )        | 0.704 ( $\pm 0.03$ )        |
| 0.50  | 0.675 ( $\pm 0.03$ ) | 0.692 ( $\pm 0.03$ )        | 0.699 ( $\pm 0.03$ )        | 0.700 ( $\pm 0.03$ ) | 0.697 ( $\pm 0.02$ )        | <b>0.706</b> ( $\pm 0.03$ ) |
| 0.60  | 0.689 ( $\pm 0.03$ ) | 0.689 ( $\pm 0.03$ )        | 0.702 ( $\pm 0.03$ )        | 0.699 ( $\pm 0.03$ ) | 0.693 ( $\pm 0.03$ )        | <b>0.706</b> ( $\pm 0.03$ ) |
| 0.70  | 0.681 ( $\pm 0.03$ ) | 0.685 ( $\pm 0.03$ )        | 0.692 ( $\pm 0.03$ )        | 0.691 ( $\pm 0.03$ ) | 0.522 ( $\pm 0.20$ )        | <b>0.696</b> ( $\pm 0.03$ ) |
| 0.80  | 0.676 ( $\pm 0.05$ ) | 0.685 ( $\pm 0.03$ )        | 0.690 ( $\pm 0.03$ )        | 0.689 ( $\pm 0.02$ ) | 0.359 ( $\pm 0.15$ )        | <b>0.696</b> ( $\pm 0.04$ ) |
| 0.90  | 0.665 ( $\pm 0.02$ ) | <b>0.681</b> ( $\pm 0.03$ ) | 0.677 ( $\pm 0.03$ )        | 0.666 ( $\pm 0.03$ ) | 0.113 ( $\pm 0.06$ )        | 0.681 ( $\pm 0.03$ )        |
| 0.99  | 0.645 ( $\pm 0.03$ ) | 0.631 ( $\pm 0.02$ )        | 0.652 ( $\pm 0.02$ )        | 0.621 ( $\pm 0.02$ ) | 0.104 ( $\pm 0.06$ )        | <b>0.660</b> ( $\pm 0.02$ ) |

Table 16: F1 scores for PUBMED under mechanism *U-MCAR* and varying  $\mu$  (GSPNis not reported as it is not designed for categorical features).

| $\mu$ | GOODIE               | FairAC               | FP                          | GNNmi                       | GCNm                 | PCFI                        |
|-------|----------------------|----------------------|-----------------------------|-----------------------------|----------------------|-----------------------------|
| 0.00  | 0.784 ( $\pm 0.01$ ) | 0.831 ( $\pm 0.00$ ) | <b>0.883</b> ( $\pm 0.00$ ) | 0.881 ( $\pm 0.00$ )        | 0.877 ( $\pm 0.00$ ) | 0.882 ( $\pm 0.00$ )        |
| 0.10  | 0.787 ( $\pm 0.00$ ) | 0.830 ( $\pm 0.00$ ) | 0.877 ( $\pm 0.00$ )        | <b>0.879</b> ( $\pm 0.00$ ) | 0.830 ( $\pm 0.00$ ) | 0.874 ( $\pm 0.00$ )        |
| 0.20  | 0.786 ( $\pm 0.00$ ) | 0.831 ( $\pm 0.00$ ) | 0.868 ( $\pm 0.00$ )        | <b>0.873</b> ( $\pm 0.00$ ) | 0.832 ( $\pm 0.00$ ) | 0.868 ( $\pm 0.00$ )        |
| 0.30  | 0.785 ( $\pm 0.00$ ) | 0.830 ( $\pm 0.00$ ) | 0.870 ( $\pm 0.00$ )        | <b>0.872</b> ( $\pm 0.00$ ) | 0.827 ( $\pm 0.00$ ) | 0.864 ( $\pm 0.00$ )        |
| 0.40  | 0.782 ( $\pm 0.00$ ) | 0.828 ( $\pm 0.00$ ) | 0.861 ( $\pm 0.00$ )        | <b>0.869</b> ( $\pm 0.00$ ) | 0.828 ( $\pm 0.00$ ) | 0.858 ( $\pm 0.00$ )        |
| 0.50  | 0.784 ( $\pm 0.00$ ) | 0.827 ( $\pm 0.00$ ) | 0.856 ( $\pm 0.00$ )        | <b>0.862</b> ( $\pm 0.00$ ) | 0.778 ( $\pm 0.00$ ) | 0.852 ( $\pm 0.00$ )        |
| 0.60  | 0.777 ( $\pm 0.00$ ) | 0.828 ( $\pm 0.00$ ) | 0.851 ( $\pm 0.00$ )        | <b>0.855</b> ( $\pm 0.00$ ) | 0.805 ( $\pm 0.00$ ) | 0.849 ( $\pm 0.00$ )        |
| 0.70  | 0.772 ( $\pm 0.00$ ) | 0.824 ( $\pm 0.00$ ) | <b>0.847</b> ( $\pm 0.00$ ) | 0.845 ( $\pm 0.00$ )        | 0.726 ( $\pm 0.00$ ) | 0.844 ( $\pm 0.00$ )        |
| 0.80  | 0.756 ( $\pm 0.00$ ) | 0.819 ( $\pm 0.00$ ) | 0.836 ( $\pm 0.00$ )        | 0.832 ( $\pm 0.00$ )        | 0.443 ( $\pm 0.00$ ) | <b>0.837</b> ( $\pm 0.00$ ) |
| 0.90  | 0.700 ( $\pm 0.00$ ) | 0.806 ( $\pm 0.00$ ) | 0.822 ( $\pm 0.00$ )        | 0.803 ( $\pm 0.00$ )        | 0.315 ( $\pm 0.00$ ) | <b>0.832</b> ( $\pm 0.00$ ) |
| 0.99  | 0.452 ( $\pm 0.00$ ) | 0.262 ( $\pm 0.00$ ) | 0.793 ( $\pm 0.00$ )        | 0.327 ( $\pm 0.00$ )        | 0.315 ( $\pm 0.00$ ) | <b>0.814</b> ( $\pm 0.00$ ) |

Table 17: F1 scores for PUBMED under mechanism *S-MCAR* and varying  $\mu$  (GSPNis not reported as it is not designed for categorical features).

| $\mu$ | GOODIE               | FairAC               | FP                          | GNNmi                       | GCNm                 | PCFI                        |
|-------|----------------------|----------------------|-----------------------------|-----------------------------|----------------------|-----------------------------|
| 0.00  | 0.784 ( $\pm 0.01$ ) | 0.831 ( $\pm 0.00$ ) | <b>0.883</b> ( $\pm 0.00$ ) | -                           | 0.877 ( $\pm 0.00$ ) | 0.882 ( $\pm 0.00$ )        |
| 0.10  | 0.786 ( $\pm 0.00$ ) | 0.831 ( $\pm 0.00$ ) | 0.875 ( $\pm 0.00$ )        | <b>0.875</b> ( $\pm 0.00$ ) | 0.870 ( $\pm 0.00$ ) | 0.871 ( $\pm 0.00$ )        |
| 0.20  | 0.783 ( $\pm 0.00$ ) | 0.827 ( $\pm 0.00$ ) | 0.869 ( $\pm 0.00$ )        | <b>0.870</b> ( $\pm 0.00$ ) | 0.861 ( $\pm 0.00$ ) | 0.867 ( $\pm 0.00$ )        |
| 0.30  | 0.785 ( $\pm 0.00$ ) | 0.832 ( $\pm 0.00$ ) | 0.863 ( $\pm 0.00$ )        | <b>0.865</b> ( $\pm 0.00$ ) | 0.861 ( $\pm 0.00$ ) | 0.863 ( $\pm 0.00$ )        |
| 0.40  | 0.785 ( $\pm 0.00$ ) | 0.828 ( $\pm 0.00$ ) | 0.856 ( $\pm 0.00$ )        | <b>0.857</b> ( $\pm 0.00$ ) | 0.848 ( $\pm 0.00$ ) | 0.856 ( $\pm 0.00$ )        |
| 0.50  | 0.775 ( $\pm 0.00$ ) | 0.827 ( $\pm 0.00$ ) | 0.853 ( $\pm 0.00$ )        | <b>0.854</b> ( $\pm 0.00$ ) | 0.808 ( $\pm 0.00$ ) | 0.848 ( $\pm 0.00$ )        |
| 0.60  | 0.774 ( $\pm 0.00$ ) | 0.822 ( $\pm 0.00$ ) | 0.843 ( $\pm 0.00$ )        | <b>0.845</b> ( $\pm 0.00$ ) | 0.798 ( $\pm 0.00$ ) | 0.843 ( $\pm 0.00$ )        |
| 0.70  | 0.760 ( $\pm 0.00$ ) | 0.813 ( $\pm 0.00$ ) | 0.832 ( $\pm 0.00$ )        | 0.827 ( $\pm 0.00$ )        | 0.762 ( $\pm 0.00$ ) | <b>0.836</b> ( $\pm 0.00$ ) |
| 0.80  | 0.744 ( $\pm 0.00$ ) | 0.806 ( $\pm 0.00$ ) | 0.828 ( $\pm 0.00$ )        | 0.808 ( $\pm 0.00$ )        | 0.683 ( $\pm 0.00$ ) | <b>0.832</b> ( $\pm 0.00$ ) |
| 0.90  | 0.706 ( $\pm 0.00$ ) | 0.786 ( $\pm 0.00$ ) | 0.815 ( $\pm 0.00$ )        | 0.743 ( $\pm 0.00$ )        | 0.421 ( $\pm 0.00$ ) | <b>0.825</b> ( $\pm 0.00$ ) |
| 0.99  | 0.441 ( $\pm 0.00$ ) | 0.259 ( $\pm 0.00$ ) | 0.765 ( $\pm 0.00$ )        | 0.333 ( $\pm 0.00$ )        | 0.310 ( $\pm 0.00$ ) | <b>0.794</b> ( $\pm 0.00$ ) |

Table 18: F1 scores for PUBMED under mechanism *LD-MCAR* and varying  $\mu$  (GSPNis not reported as it is not designed for categorical features).

| $\mu$ | GOODIE               | FairAC               | FP                          | GNNmi                       | GCNmf                | PCFI                 |
|-------|----------------------|----------------------|-----------------------------|-----------------------------|----------------------|----------------------|
| 0.00  | 0.784 ( $\pm 0.01$ ) | 0.831 ( $\pm 0.00$ ) | <b>0.883</b> ( $\pm 0.00$ ) | 0.881 ( $\pm 0.00$ )        | 0.877 ( $\pm 0.00$ ) | 0.882 ( $\pm 0.00$ ) |
| 0.10  | 0.738 ( $\pm 0.00$ ) | 0.824 ( $\pm 0.00$ ) | 0.855 ( $\pm 0.00$ )        | <b>0.857</b> ( $\pm 0.00$ ) | 0.830 ( $\pm 0.00$ ) | 0.852 ( $\pm 0.00$ ) |
| 0.20  | 0.700 ( $\pm 0.00$ ) | 0.820 ( $\pm 0.00$ ) | 0.845 ( $\pm 0.00$ )        | <b>0.851</b> ( $\pm 0.00$ ) | 0.828 ( $\pm 0.00$ ) | 0.844 ( $\pm 0.00$ ) |
| 0.30  | 0.607 ( $\pm 0.00$ ) | 0.823 ( $\pm 0.00$ ) | 0.843 ( $\pm 0.00$ )        | <b>0.844</b> ( $\pm 0.00$ ) | 0.823 ( $\pm 0.00$ ) | 0.836 ( $\pm 0.00$ ) |
| 0.40  | 0.534 ( $\pm 0.00$ ) | 0.821 ( $\pm 0.00$ ) | 0.834 ( $\pm 0.00$ )        | <b>0.842</b> ( $\pm 0.00$ ) | 0.818 ( $\pm 0.00$ ) | 0.830 ( $\pm 0.00$ ) |
| 0.50  | 0.509 ( $\pm 0.00$ ) | 0.814 ( $\pm 0.00$ ) | 0.818 ( $\pm 0.00$ )        | <b>0.823</b> ( $\pm 0.00$ ) | 0.797 ( $\pm 0.00$ ) | 0.820 ( $\pm 0.00$ ) |
| 0.60  | 0.422 ( $\pm 0.00$ ) | 0.812 ( $\pm 0.00$ ) | 0.808 ( $\pm 0.00$ )        | <b>0.816</b> ( $\pm 0.00$ ) | 0.787 ( $\pm 0.00$ ) | 0.812 ( $\pm 0.00$ ) |
| 0.70  | 0.415 ( $\pm 0.00$ ) | 0.802 ( $\pm 0.00$ ) | 0.797 ( $\pm 0.00$ )        | <b>0.811</b> ( $\pm 0.00$ ) | 0.779 ( $\pm 0.00$ ) | 0.801 ( $\pm 0.00$ ) |
| 0.80  | 0.396 ( $\pm 0.00$ ) | 0.779 ( $\pm 0.00$ ) | 0.749 ( $\pm 0.00$ )        | <b>0.783</b> ( $\pm 0.00$ ) | 0.713 ( $\pm 0.00$ ) | 0.754 ( $\pm 0.00$ ) |
| 0.90  | 0.306 ( $\pm 0.00$ ) | 0.574 ( $\pm 0.00$ ) | 0.693 ( $\pm 0.00$ )        | <b>0.700</b> ( $\pm 0.00$ ) | 0.391 ( $\pm 0.00$ ) | 0.683 ( $\pm 0.00$ ) |
| 0.99  | 0.198 ( $\pm 0.00$ ) | 0.266 ( $\pm 0.00$ ) | 0.303 ( $\pm 0.00$ )        | <b>0.330</b> ( $\pm 0.00$ ) | 0.306 ( $\pm 0.00$ ) | 0.305 ( $\pm 0.00$ ) |

Table 19: F1 scores for PUBMED under mechanism *FD-MNAR* and varying  $\mu$  (GSPNis not reported as it is not designed for categorical features).

| $\mu$ | GOODIE               | FairAC               | FP                          | GNNmi                       | GCNmf                       | PCFI                        |
|-------|----------------------|----------------------|-----------------------------|-----------------------------|-----------------------------|-----------------------------|
| 0.00  | 0.784 ( $\pm 0.01$ ) | 0.831 ( $\pm 0.00$ ) | <b>0.883</b> ( $\pm 0.00$ ) | 0.881 ( $\pm 0.00$ )        | 0.877 ( $\pm 0.00$ )        | 0.882 ( $\pm 0.00$ )        |
| 0.10  | 0.785 ( $\pm 0.02$ ) | 0.832 ( $\pm 0.00$ ) | 0.876 ( $\pm 0.01$ )        | <b>0.880</b> ( $\pm 0.01$ ) | 0.834 ( $\pm 0.00$ )        | 0.874 ( $\pm 0.01$ )        |
| 0.20  | 0.785 ( $\pm 0.02$ ) | 0.834 ( $\pm 0.00$ ) | 0.869 ( $\pm 0.00$ )        | <b>0.875</b> ( $\pm 0.00$ ) | 0.832 ( $\pm 0.00$ )        | 0.869 ( $\pm 0.01$ )        |
| 0.30  | 0.785 ( $\pm 0.02$ ) | 0.830 ( $\pm 0.00$ ) | 0.865 ( $\pm 0.00$ )        | <b>0.870</b> ( $\pm 0.00$ ) | 0.829 ( $\pm 0.00$ )        | 0.860 ( $\pm 0.00$ )        |
| 0.40  | 0.780 ( $\pm 0.01$ ) | 0.827 ( $\pm 0.00$ ) | 0.860 ( $\pm 0.00$ )        | <b>0.866</b> ( $\pm 0.00$ ) | 0.733 ( $\pm 0.11$ )        | 0.856 ( $\pm 0.00$ )        |
| 0.50  | 0.775 ( $\pm 0.02$ ) | 0.822 ( $\pm 0.00$ ) | 0.853 ( $\pm 0.00$ )        | <b>0.859</b> ( $\pm 0.00$ ) | 0.720 ( $\pm 0.12$ )        | 0.850 ( $\pm 0.00$ )        |
| 0.60  | 0.763 ( $\pm 0.02$ ) | 0.824 ( $\pm 0.01$ ) | 0.847 ( $\pm 0.01$ )        | <b>0.850</b> ( $\pm 0.00$ ) | 0.746 ( $\pm 0.04$ )        | 0.842 ( $\pm 0.00$ )        |
| 0.70  | 0.745 ( $\pm 0.03$ ) | 0.813 ( $\pm 0.00$ ) | 0.836 ( $\pm 0.00$ )        | 0.834 ( $\pm 0.00$ )        | 0.579 ( $\pm 0.25$ )        | <b>0.837</b> ( $\pm 0.00$ ) |
| 0.80  | 0.745 ( $\pm 0.03$ ) | 0.819 ( $\pm 0.00$ ) | 0.759 ( $\pm 0.04$ )        | <b>0.829</b> ( $\pm 0.00$ ) | 0.555 ( $\pm 0.14$ )        | 0.764 ( $\pm 0.00$ )        |
| 0.90  | 0.336 ( $\pm 0.01$ ) | 0.806 ( $\pm 0.00$ ) | 0.693 ( $\pm 0.01$ )        | <b>0.812</b> ( $\pm 0.00$ ) | 0.529 ( $\pm 0.13$ )        | 0.653 ( $\pm 0.00$ )        |
| 0.99  | 0.278 ( $\pm 0.01$ ) | 0.282 ( $\pm 0.01$ ) | 0.303 ( $\pm 0.05$ )        | 0.347 ( $\pm 0.00$ )        | <b>0.399</b> ( $\pm 0.33$ ) | 0.335 ( $\pm 0.01$ )        |

Table 20: F1 scores for PUBMED under mechanism *CD-MNAR* and varying  $\mu$  (GSPNis not reported as it is not designed for categorical features).

| $\mu$ | GOODIE               | FairAC               | FP                          | GNNmi                       | GCNmf                | PCFI                        |
|-------|----------------------|----------------------|-----------------------------|-----------------------------|----------------------|-----------------------------|
| 0.00  | 0.784 ( $\pm 0.01$ ) | 0.831 ( $\pm 0.00$ ) | <b>0.883</b> ( $\pm 0.00$ ) | 0.881 ( $\pm 0.00$ )        | 0.877 ( $\pm 0.00$ ) | 0.882 ( $\pm 0.00$ )        |
| 0.10  | 0.789 ( $\pm 0.02$ ) | 0.829 ( $\pm 0.00$ ) | 0.878 ( $\pm 0.00$ )        | <b>0.880</b> ( $\pm 0.00$ ) | 0.835 ( $\pm 0.00$ ) | 0.877 ( $\pm 0.00$ )        |
| 0.20  | 0.783 ( $\pm 0.01$ ) | 0.830 ( $\pm 0.00$ ) | 0.870 ( $\pm 0.00$ )        | <b>0.876</b> ( $\pm 0.00$ ) | 0.834 ( $\pm 0.00$ ) | 0.867 ( $\pm 0.01$ )        |
| 0.30  | 0.783 ( $\pm 0.02$ ) | 0.828 ( $\pm 0.00$ ) | 0.863 ( $\pm 0.00$ )        | <b>0.871</b> ( $\pm 0.00$ ) | 0.823 ( $\pm 0.00$ ) | 0.866 ( $\pm 0.00$ )        |
| 0.40  | 0.777 ( $\pm 0.02$ ) | 0.826 ( $\pm 0.00$ ) | 0.858 ( $\pm 0.00$ )        | <b>0.863</b> ( $\pm 0.00$ ) | 0.830 ( $\pm 0.00$ ) | 0.857 ( $\pm 0.01$ )        |
| 0.50  | 0.779 ( $\pm 0.01$ ) | 0.825 ( $\pm 0.00$ ) | 0.853 ( $\pm 0.00$ )        | <b>0.858</b> ( $\pm 0.00$ ) | 0.826 ( $\pm 0.00$ ) | 0.853 ( $\pm 0.00$ )        |
| 0.60  | 0.769 ( $\pm 0.02$ ) | 0.824 ( $\pm 0.00$ ) | 0.847 ( $\pm 0.01$ )        | <b>0.848</b> ( $\pm 0.01$ ) | 0.784 ( $\pm 0.04$ ) | 0.848 ( $\pm 0.00$ )        |
| 0.70  | 0.752 ( $\pm 0.03$ ) | 0.816 ( $\pm 0.00$ ) | 0.837 ( $\pm 0.00$ )        | 0.835 ( $\pm 0.00$ )        | 0.765 ( $\pm 0.02$ ) | <b>0.837</b> ( $\pm 0.00$ ) |
| 0.80  | 0.742 ( $\pm 0.03$ ) | 0.813 ( $\pm 0.00$ ) | 0.828 ( $\pm 0.00$ )        | 0.817 ( $\pm 0.00$ )        | 0.323 ( $\pm 0.10$ ) | <b>0.836</b> ( $\pm 0.00$ ) |
| 0.90  | 0.605 ( $\pm 0.13$ ) | 0.628 ( $\pm 0.24$ ) | 0.812 ( $\pm 0.00$ )        | 0.770 ( $\pm 0.00$ )        | 0.280 ( $\pm 0.05$ ) | <b>0.823</b> ( $\pm 0.00$ ) |
| 0.99  | 0.557 ( $\pm 0.14$ ) | 0.260 ( $\pm 0.00$ ) | 0.800 ( $\pm 0.00$ )        | 0.689 ( $\pm 0.01$ )        | 0.418 ( $\pm 0.04$ ) | <b>0.818</b> ( $\pm 0.00$ ) |

Table 21: F1 scores for SYNTHETIC under mechanism *U-MCAR* and varying  $\mu$ 

| $\mu$ | GOODIE                      | GSPN                 | FairAC               | FP                          | GNNmi                       | GCNmf                | PCFI                        | GNNmim                      |
|-------|-----------------------------|----------------------|----------------------|-----------------------------|-----------------------------|----------------------|-----------------------------|-----------------------------|
| 0.00  | 0.812 ( $\pm 0.00$ )        | 0.865 ( $\pm 0.00$ ) | 0.815 ( $\pm 0.00$ ) | 0.980 ( $\pm 0.00$ )        | 0.982 ( $\pm 0.00$ )        | 0.978 ( $\pm 0.00$ ) | 0.977 ( $\pm 0.00$ )        | <b>0.983</b> ( $\pm 0.01$ ) |
| 0.10  | 0.810 ( $\pm 0.00$ )        | 0.822 ( $\pm 0.00$ ) | 0.825 ( $\pm 0.00$ ) | <b>0.910</b> ( $\pm 0.00$ ) | 0.902 ( $\pm 0.00$ )        | 0.875 ( $\pm 0.00$ ) | 0.898 ( $\pm 0.00$ )        | 0.901 ( $\pm 0.00$ )        |
| 0.20  | 0.792 ( $\pm 0.00$ )        | 0.759 ( $\pm 0.00$ ) | 0.808 ( $\pm 0.00$ ) | 0.863 ( $\pm 0.00$ )        | <b>0.870</b> ( $\pm 0.00$ ) | 0.790 ( $\pm 0.00$ ) | 0.855 ( $\pm 0.00$ )        | 0.861 ( $\pm 0.00$ )        |
| 0.30  | 0.758 ( $\pm 0.00$ )        | 0.768 ( $\pm 0.00$ ) | 0.762 ( $\pm 0.00$ ) | 0.795 ( $\pm 0.00$ )        | 0.808 ( $\pm 0.00$ )        | 0.770 ( $\pm 0.00$ ) | 0.805 ( $\pm 0.00$ )        | <b>0.815</b> ( $\pm 0.00$ ) |
| 0.40  | 0.758 ( $\pm 0.00$ )        | 0.749 ( $\pm 0.00$ ) | 0.759 ( $\pm 0.00$ ) | 0.764 ( $\pm 0.00$ )        | 0.771 ( $\pm 0.00$ )        | 0.745 ( $\pm 0.00$ ) | 0.763 ( $\pm 0.00$ )        | <b>0.791</b> ( $\pm 0.00$ ) |
| 0.50  | 0.747 ( $\pm 0.00$ )        | 0.721 ( $\pm 0.00$ ) | 0.642 ( $\pm 0.00$ ) | 0.745 ( $\pm 0.00$ )        | 0.745 ( $\pm 0.00$ )        | 0.710 ( $\pm 0.00$ ) | <b>0.748</b> ( $\pm 0.00$ ) | 0.739 ( $\pm 0.00$ )        |
| 0.60  | <b>0.773</b> ( $\pm 0.00$ ) | 0.708 ( $\pm 0.00$ ) | 0.680 ( $\pm 0.00$ ) | 0.720 ( $\pm 0.00$ )        | 0.737 ( $\pm 0.00$ )        | 0.692 ( $\pm 0.00$ ) | 0.717 ( $\pm 0.00$ )        | 0.714 ( $\pm 0.00$ )        |
| 0.70  | <b>0.742</b> ( $\pm 0.00$ ) | 0.629 ( $\pm 0.00$ ) | 0.611 ( $\pm 0.00$ ) | 0.683 ( $\pm 0.00$ )        | 0.689 ( $\pm 0.00$ )        | 0.673 ( $\pm 0.00$ ) | 0.678 ( $\pm 0.00$ )        | 0.693 ( $\pm 0.00$ )        |
| 0.80  | <b>0.771</b> ( $\pm 0.00$ ) | 0.579 ( $\pm 0.00$ ) | 0.621 ( $\pm 0.00$ ) | 0.632 ( $\pm 0.00$ )        | 0.638 ( $\pm 0.00$ )        | 0.601 ( $\pm 0.00$ ) | 0.638 ( $\pm 0.00$ )        | 0.649 ( $\pm 0.00$ )        |
| 0.90  | <b>0.776</b> ( $\pm 0.00$ ) | 0.544 ( $\pm 0.00$ ) | 0.567 ( $\pm 0.00$ ) | 0.605 ( $\pm 0.00$ )        | 0.602 ( $\pm 0.00$ )        | 0.592 ( $\pm 0.00$ ) | 0.588 ( $\pm 0.00$ )        | 0.590 ( $\pm 0.00$ )        |
| 0.99  | <b>0.762</b> ( $\pm 0.00$ ) | 0.499 ( $\pm 0.00$ ) | 0.391 ( $\pm 0.00$ ) | 0.542 ( $\pm 0.00$ )        | 0.367 ( $\pm 0.00$ )        | 0.471 ( $\pm 0.00$ ) | 0.547 ( $\pm 0.00$ )        | 0.535 ( $\pm 0.00$ )        |

Table 22: F1 scores for SYNTHETIC under mechanism *S-MCAR* and varying  $\mu$ 

| $\mu$ | GOODIE               | GSPN                 | FairAC               | FP                          | GNNmi                       | GCNmf                | PCFI                 | GNNmim                      |
|-------|----------------------|----------------------|----------------------|-----------------------------|-----------------------------|----------------------|----------------------|-----------------------------|
| 0.00  | 0.812 ( $\pm 0.00$ ) | 0.865 ( $\pm 0.00$ ) | 0.815 ( $\pm 0.00$ ) | 0.980 ( $\pm 0.00$ )        | 0.982 ( $\pm 0.00$ )        | 0.978 ( $\pm 0.00$ ) | 0.977 ( $\pm 0.00$ ) | <b>0.983</b> ( $\pm 0.01$ ) |
| 0.10  | 0.756 ( $\pm 0.00$ ) | 0.748 ( $\pm 0.00$ ) | 0.723 ( $\pm 0.00$ ) | 0.903 ( $\pm 0.00$ )        | <b>0.912</b> ( $\pm 0.00$ ) | 0.903 ( $\pm 0.00$ ) | 0.900 ( $\pm 0.00$ ) | 0.898 ( $\pm 0.00$ )        |
| 0.20  | 0.769 ( $\pm 0.00$ ) | 0.733 ( $\pm 0.00$ ) | 0.727 ( $\pm 0.00$ ) | <b>0.883</b> ( $\pm 0.00$ ) | 0.883 ( $\pm 0.00$ )        | 0.872 ( $\pm 0.00$ ) | 0.870 ( $\pm 0.00$ ) | 0.875 ( $\pm 0.00$ )        |
| 0.30  | 0.742 ( $\pm 0.00$ ) | 0.737 ( $\pm 0.00$ ) | 0.700 ( $\pm 0.00$ ) | 0.830 ( $\pm 0.00$ )        | <b>0.842</b> ( $\pm 0.00$ ) | 0.841 ( $\pm 0.00$ ) | 0.831 ( $\pm 0.00$ ) | 0.833 ( $\pm 0.00$ )        |
| 0.40  | 0.716 ( $\pm 0.00$ ) | 0.712 ( $\pm 0.00$ ) | 0.683 ( $\pm 0.00$ ) | <b>0.810</b> ( $\pm 0.00$ ) | 0.798 ( $\pm 0.00$ )        | 0.752 ( $\pm 0.00$ ) | 0.793 ( $\pm 0.00$ ) | 0.799 ( $\pm 0.00$ )        |
| 0.50  | 0.700 ( $\pm 0.00$ ) | 0.711 ( $\pm 0.00$ ) | 0.704 ( $\pm 0.00$ ) | 0.785 ( $\pm 0.00$ )        | <b>0.788</b> ( $\pm 0.00$ ) | 0.705 ( $\pm 0.00$ ) | 0.780 ( $\pm 0.00$ ) | 0.779 ( $\pm 0.00$ )        |
| 0.60  | 0.658 ( $\pm 0.00$ ) | 0.674 ( $\pm 0.00$ ) | 0.695 ( $\pm 0.00$ ) | 0.747 ( $\pm 0.00$ )        | <b>0.761</b> ( $\pm 0.00$ ) | 0.726 ( $\pm 0.00$ ) | 0.738 ( $\pm 0.00$ ) | 0.756 ( $\pm 0.00$ )        |
| 0.70  | 0.618 ( $\pm 0.00$ ) | 0.675 ( $\pm 0.00$ ) | 0.652 ( $\pm 0.00$ ) | 0.687 ( $\pm 0.00$ )        | 0.703 ( $\pm 0.00$ )        | 0.665 ( $\pm 0.00$ ) | 0.700 ( $\pm 0.00$ ) | <b>0.727</b> ( $\pm 0.00$ ) |
| 0.80  | 0.584 ( $\pm 0.00$ ) | 0.649 ( $\pm 0.00$ ) | 0.616 ( $\pm 0.00$ ) | 0.653 ( $\pm 0.00$ )        | 0.667 ( $\pm 0.00$ )        | 0.645 ( $\pm 0.00$ ) | 0.638 ( $\pm 0.00$ ) | <b>0.676</b> ( $\pm 0.00$ ) |
| 0.90  | 0.527 ( $\pm 0.00$ ) | 0.588 ( $\pm 0.00$ ) | 0.589 ( $\pm 0.00$ ) | <b>0.597</b> ( $\pm 0.00$ ) | 0.597 ( $\pm 0.00$ )        | 0.578 ( $\pm 0.00$ ) | 0.591 ( $\pm 0.00$ ) | 0.582 ( $\pm 0.00$ )        |
| 0.99  | 0.337 ( $\pm 0.00$ ) | 0.455 ( $\pm 0.00$ ) | 0.338 ( $\pm 0.00$ ) | <b>0.515</b> ( $\pm 0.00$ ) | 0.425 ( $\pm 0.00$ )        | 0.403 ( $\pm 0.00$ ) | 0.513 ( $\pm 0.00$ ) | 0.477 ( $\pm 0.00$ )        |

Table 23: F1 scores for SYNTHETIC under mechanism *LD-MCAR* and varying  $\mu$ 

| $\mu$ | GOODIE                      | GSPN                 | FairAC               | FP                          | GNNmi                       | GCNmf                | PCFI                        | GNNmim                      |
|-------|-----------------------------|----------------------|----------------------|-----------------------------|-----------------------------|----------------------|-----------------------------|-----------------------------|
| 0.00  | 0.812 ( $\pm 0.00$ )        | 0.865 ( $\pm 0.00$ ) | 0.815 ( $\pm 0.00$ ) | 0.980 ( $\pm 0.00$ )        | <b>0.982</b> ( $\pm 0.00$ ) | 0.978 ( $\pm 0.00$ ) | 0.977 ( $\pm 0.00$ )        | 0.886 ( $\pm 0.00$ )        |
| 0.10  | 0.778 ( $\pm 0.00$ )        | 0.785 ( $\pm 0.00$ ) | 0.792 ( $\pm 0.00$ ) | 0.860 ( $\pm 0.00$ )        | 0.857 ( $\pm 0.00$ )        | 0.845 ( $\pm 0.00$ ) | <b>0.860</b> ( $\pm 0.00$ ) | 0.829 ( $\pm 0.00$ )        |
| 0.20  | 0.760 ( $\pm 0.00$ )        | 0.731 ( $\pm 0.00$ ) | 0.705 ( $\pm 0.00$ ) | <b>0.788</b> ( $\pm 0.00$ ) | 0.770 ( $\pm 0.00$ )        | 0.741 ( $\pm 0.00$ ) | 0.772 ( $\pm 0.00$ )        | 0.780 ( $\pm 0.00$ )        |
| 0.30  | 0.730 ( $\pm 0.00$ )        | 0.666 ( $\pm 0.00$ ) | 0.718 ( $\pm 0.00$ ) | 0.736 ( $\pm 0.00$ )        | 0.733 ( $\pm 0.00$ )        | 0.730 ( $\pm 0.00$ ) | 0.734 ( $\pm 0.00$ )        | <b>0.738</b> ( $\pm 0.00$ ) |
| 0.40  | <b>0.736</b> ( $\pm 0.00$ ) | 0.625 ( $\pm 0.00$ ) | 0.607 ( $\pm 0.00$ ) | 0.661 ( $\pm 0.00$ )        | 0.659 ( $\pm 0.00$ )        | 0.673 ( $\pm 0.00$ ) | 0.649 ( $\pm 0.00$ )        | 0.703 ( $\pm 0.00$ )        |
| 0.50  | <b>0.761</b> ( $\pm 0.00$ ) | 0.547 ( $\pm 0.00$ ) | 0.542 ( $\pm 0.00$ ) | 0.619 ( $\pm 0.00$ )        | 0.618 ( $\pm 0.00$ )        | 0.628 ( $\pm 0.00$ ) | 0.613 ( $\pm 0.00$ )        | 0.682 ( $\pm 0.00$ )        |
| 0.60  | <b>0.768</b> ( $\pm 0.00$ ) | 0.594 ( $\pm 0.00$ ) | 0.543 ( $\pm 0.00$ ) | 0.621 ( $\pm 0.00$ )        | 0.613 ( $\pm 0.00$ )        | 0.619 ( $\pm 0.00$ ) | 0.605 ( $\pm 0.00$ )        | 0.667 ( $\pm 0.00$ )        |
| 0.70  | <b>0.759</b> ( $\pm 0.00$ ) | 0.603 ( $\pm 0.00$ ) | 0.586 ( $\pm 0.00$ ) | 0.617 ( $\pm 0.00$ )        | 0.607 ( $\pm 0.00$ )        | 0.591 ( $\pm 0.00$ ) | 0.594 ( $\pm 0.00$ )        | 0.675 ( $\pm 0.00$ )        |
| 0.80  | <b>0.758</b> ( $\pm 0.00$ ) | 0.613 ( $\pm 0.00$ ) | 0.486 ( $\pm 0.00$ ) | 0.617 ( $\pm 0.00$ )        | 0.622 ( $\pm 0.00$ )        | 0.631 ( $\pm 0.00$ ) | 0.620 ( $\pm 0.00$ )        | 0.666 ( $\pm 0.00$ )        |
| 0.90  | <b>0.775</b> ( $\pm 0.00$ ) | 0.544 ( $\pm 0.00$ ) | 0.529 ( $\pm 0.00$ ) | 0.623 ( $\pm 0.00$ )        | 0.633 ( $\pm 0.00$ )        | 0.623 ( $\pm 0.00$ ) | 0.606 ( $\pm 0.00$ )        | 0.678 ( $\pm 0.00$ )        |
| 0.99  | <b>0.764</b> ( $\pm 0.00$ ) | 0.569 ( $\pm 0.00$ ) | 0.557 ( $\pm 0.00$ ) | 0.609 ( $\pm 0.00$ )        | 0.611 ( $\pm 0.00$ )        | 0.643 ( $\pm 0.00$ ) | 0.612 ( $\pm 0.00$ )        | 0.667 ( $\pm 0.00$ )        |

Table 24: F1 scores for SYNTHETIC under mechanism *FD-MNAR* and varying  $\mu$ 

| $\mu$ | GOODIE               | GSPN                        | FairAC               | FP                   | GNNmi                       | GCNmf                | PCFI                        | GNNmim                      |
|-------|----------------------|-----------------------------|----------------------|----------------------|-----------------------------|----------------------|-----------------------------|-----------------------------|
| 0.00  | 0.812 ( $\pm 0.00$ ) | 0.865 ( $\pm 0.00$ )        | 0.815 ( $\pm 0.00$ ) | 0.980 ( $\pm 0.00$ ) | 0.982 ( $\pm 0.00$ )        | 0.978 ( $\pm 0.00$ ) | 0.977 ( $\pm 0.00$ )        | <b>0.983</b> ( $\pm 0.01$ ) |
| 0.10  | 0.751 ( $\pm 0.05$ ) | 0.750 ( $\pm 0.03$ )        | 0.761 ( $\pm 0.02$ ) | 0.893 ( $\pm 0.01$ ) | <b>0.900</b> ( $\pm 0.02$ ) | 0.878 ( $\pm 0.02$ ) | 0.895 ( $\pm 0.01$ )        | 0.895 ( $\pm 0.01$ )        |
| 0.20  | 0.750 ( $\pm 0.03$ ) | 0.721 ( $\pm 0.01$ )        | 0.699 ( $\pm 0.04$ ) | 0.836 ( $\pm 0.02$ ) | 0.845 ( $\pm 0.02$ )        | 0.785 ( $\pm 0.04$ ) | <b>0.847</b> ( $\pm 0.02$ ) | 0.843 ( $\pm 0.04$ )        |
| 0.30  | 0.691 ( $\pm 0.04$ ) | 0.678 ( $\pm 0.02$ )        | 0.667 ( $\pm 0.03$ ) | 0.810 ( $\pm 0.01$ ) | <b>0.812</b> ( $\pm 0.01$ ) | 0.771 ( $\pm 0.03$ ) | 0.789 ( $\pm 0.01$ )        | 0.812 ( $\pm 0.01$ )        |
| 0.40  | 0.693 ( $\pm 0.03$ ) | 0.678 ( $\pm 0.03$ )        | 0.682 ( $\pm 0.03$ ) | 0.791 ( $\pm 0.02$ ) | 0.798 ( $\pm 0.00$ )        | 0.763 ( $\pm 0.02$ ) | 0.791 ( $\pm 0.00$ )        | <b>0.806</b> ( $\pm 0.01$ ) |
| 0.50  | 0.673 ( $\pm 0.04$ ) | 0.668 ( $\pm 0.01$ )        | 0.676 ( $\pm 0.03$ ) | 0.753 ( $\pm 0.01$ ) | 0.758 ( $\pm 0.02$ )        | 0.713 ( $\pm 0.03$ ) | 0.752 ( $\pm 0.01$ )        | <b>0.763</b> ( $\pm 0.01$ ) |
| 0.60  | 0.620 ( $\pm 0.02$ ) | 0.608 ( $\pm 0.02$ )        | 0.610 ( $\pm 0.02$ ) | 0.708 ( $\pm 0.01$ ) | 0.715 ( $\pm 0.00$ )        | 0.685 ( $\pm 0.02$ ) | 0.702 ( $\pm 0.02$ )        | <b>0.727</b> ( $\pm 0.01$ ) |
| 0.70  | 0.494 ( $\pm 0.07$ ) | 0.580 ( $\pm 0.06$ )        | 0.588 ( $\pm 0.02$ ) | 0.651 ( $\pm 0.03$ ) | 0.670 ( $\pm 0.04$ )        | 0.631 ( $\pm 0.03$ ) | 0.653 ( $\pm 0.04$ )        | <b>0.688</b> ( $\pm 0.02$ ) |
| 0.80  | 0.425 ( $\pm 0.07$ ) | 0.607 ( $\pm 0.04$ )        | 0.577 ( $\pm 0.01$ ) | 0.611 ( $\pm 0.01$ ) | 0.627 ( $\pm 0.02$ )        | 0.589 ( $\pm 0.03$ ) | 0.596 ( $\pm 0.01$ )        | <b>0.639</b> ( $\pm 0.02$ ) |
| 0.90  | 0.362 ( $\pm 0.02$ ) | <b>0.625</b> ( $\pm 0.02$ ) | 0.512 ( $\pm 0.05$ ) | 0.575 ( $\pm 0.02$ ) | 0.595 ( $\pm 0.02$ )        | 0.573 ( $\pm 0.02$ ) | 0.582 ( $\pm 0.01$ )        | 0.612 ( $\pm 0.00$ )        |
| 0.99  | 0.429 ( $\pm 0.13$ ) | 0.570 ( $\pm 0.02$ )        | 0.423 ( $\pm 0.11$ ) | 0.547 ( $\pm 0.02$ ) | 0.536 ( $\pm 0.01$ )        | 0.490 ( $\pm 0.05$ ) | 0.551 ( $\pm 0.01$ )        | <b>0.576</b> ( $\pm 0.02$ ) |

Table 25: F1 scores for SYNTHETIC under mechanism *CD-MNAR* and varying  $\mu$ 

| $\mu$ | GOODIE               | GSPN                 | FairAC               | FP                          | GNNmi                       | GCNmf                | PCFI                 | GNNmim                      |
|-------|----------------------|----------------------|----------------------|-----------------------------|-----------------------------|----------------------|----------------------|-----------------------------|
| 0.00  | 0.812 ( $\pm 0.00$ ) | 0.865 ( $\pm 0.00$ ) | 0.815 ( $\pm 0.00$ ) | 0.980 ( $\pm 0.00$ )        | 0.982 ( $\pm 0.00$ )        | 0.978 ( $\pm 0.00$ ) | 0.977 ( $\pm 0.00$ ) | <b>0.983</b> ( $\pm 0.01$ ) |
| 0.10  | 0.756 ( $\pm 0.04$ ) | 0.757 ( $\pm 0.02$ ) | 0.752 ( $\pm 0.02$ ) | 0.913 ( $\pm 0.02$ )        | <b>0.918</b> ( $\pm 0.02$ ) | 0.882 ( $\pm 0.02$ ) | 0.912 ( $\pm 0.01$ ) | 0.913 ( $\pm 0.02$ )        |
| 0.20  | 0.730 ( $\pm 0.05$ ) | 0.718 ( $\pm 0.02$ ) | 0.674 ( $\pm 0.05$ ) | 0.856 ( $\pm 0.03$ )        | <b>0.868</b> ( $\pm 0.03$ ) | 0.800 ( $\pm 0.04$ ) | 0.861 ( $\pm 0.04$ ) | 0.865 ( $\pm 0.03$ )        |
| 0.30  | 0.663 ( $\pm 0.05$ ) | 0.716 ( $\pm 0.02$ ) | 0.689 ( $\pm 0.03$ ) | 0.803 ( $\pm 0.02$ )        | 0.820 ( $\pm 0.02$ )        | 0.768 ( $\pm 0.03$ ) | 0.810 ( $\pm 0.03$ ) | <b>0.830</b> ( $\pm 0.03$ ) |
| 0.40  | 0.530 ( $\pm 0.16$ ) | 0.678 ( $\pm 0.01$ ) | 0.718 ( $\pm 0.03$ ) | 0.744 ( $\pm 0.01$ )        | 0.749 ( $\pm 0.00$ )        | 0.753 ( $\pm 0.01$ ) | 0.739 ( $\pm 0.03$ ) | <b>0.776</b> ( $\pm 0.01$ ) |
| 0.50  | 0.487 ( $\pm 0.12$ ) | 0.662 ( $\pm 0.03$ ) | 0.655 ( $\pm 0.04$ ) | 0.697 ( $\pm 0.03$ )        | 0.695 ( $\pm 0.03$ )        | 0.683 ( $\pm 0.04$ ) | 0.699 ( $\pm 0.04$ ) | <b>0.725</b> ( $\pm 0.01$ ) |
| 0.60  | 0.575 ( $\pm 0.06$ ) | 0.696 ( $\pm 0.03$ ) | 0.577 ( $\pm 0.02$ ) | 0.683 ( $\pm 0.03$ )        | 0.658 ( $\pm 0.03$ )        | 0.666 ( $\pm 0.02$ ) | 0.645 ( $\pm 0.03$ ) | <b>0.731</b> ( $\pm 0.03$ ) |
| 0.70  | 0.553 ( $\pm 0.03$ ) | 0.616 ( $\pm 0.03$ ) | 0.583 ( $\pm 0.02$ ) | 0.613 ( $\pm 0.02$ )        | 0.600 ( $\pm 0.04$ )        | 0.617 ( $\pm 0.04$ ) | 0.592 ( $\pm 0.05$ ) | <b>0.668</b> ( $\pm 0.01$ ) |
| 0.80  | 0.486 ( $\pm 0.06$ ) | 0.638 ( $\pm 0.03$ ) | 0.592 ( $\pm 0.03$ ) | 0.588 ( $\pm 0.02$ )        | 0.596 ( $\pm 0.03$ )        | 0.570 ( $\pm 0.02$ ) | 0.563 ( $\pm 0.03$ ) | <b>0.655</b> ( $\pm 0.02$ ) |
| 0.90  | 0.432 ( $\pm 0.08$ ) | 0.618 ( $\pm 0.05$ ) | 0.479 ( $\pm 0.10$ ) | 0.586 ( $\pm 0.04$ )        | 0.607 ( $\pm 0.03$ )        | 0.556 ( $\pm 0.03$ ) | 0.553 ( $\pm 0.01$ ) | <b>0.635</b> ( $\pm 0.04$ ) |
| 0.99  | 0.468 ( $\pm 0.03$ ) | 0.545 ( $\pm 0.06$ ) | 0.396 ( $\pm 0.08$ ) | <b>0.594</b> ( $\pm 0.01$ ) | 0.537 ( $\pm 0.01$ )        | 0.475 ( $\pm 0.06$ ) | 0.549 ( $\pm 0.03$ ) | 0.568 ( $\pm 0.01$ )        |

Table 26: F1 scores for AIR under mechanism *U-MCAR* and varying  $\mu$ 

| $\mu$ | GOODIE                      | GSPN                 | FairAC               | FP                          | GNNmi                       | GCNmf                | PCFI                        | GNNmim                      |
|-------|-----------------------------|----------------------|----------------------|-----------------------------|-----------------------------|----------------------|-----------------------------|-----------------------------|
| 0.00  | 0.724 ( $\pm 0.00$ )        | 0.798 ( $\pm 0.02$ ) | 0.733 ( $\pm 0.00$ ) | 0.918 ( $\pm 0.00$ )        | 0.922 ( $\pm 0.01$ )        | 0.922 ( $\pm 0.00$ ) | 0.891 ( $\pm 0.00$ )        | <b>0.930</b> ( $\pm 0.00$ ) |
| 0.10  | 0.665 ( $\pm 0.00$ )        | 0.710 ( $\pm 0.00$ ) | 0.733 ( $\pm 0.00$ ) | 0.895 ( $\pm 0.00$ )        | 0.891 ( $\pm 0.00$ )        | 0.768 ( $\pm 0.00$ ) | 0.883 ( $\pm 0.00$ )        | <b>0.899</b> ( $\pm 0.00$ ) |
| 0.20  | 0.669 ( $\pm 0.00$ )        | 0.582 ( $\pm 0.00$ ) | 0.709 ( $\pm 0.00$ ) | 0.848 ( $\pm 0.00$ )        | 0.833 ( $\pm 0.00$ )        | 0.747 ( $\pm 0.00$ ) | 0.852 ( $\pm 0.00$ )        | <b>0.859</b> ( $\pm 0.00$ ) |
| 0.30  | 0.669 ( $\pm 0.00$ )        | 0.502 ( $\pm 0.00$ ) | 0.715 ( $\pm 0.00$ ) | 0.836 ( $\pm 0.00$ )        | 0.837 ( $\pm 0.00$ )        | 0.712 ( $\pm 0.00$ ) | 0.836 ( $\pm 0.00$ )        | <b>0.852</b> ( $\pm 0.00$ ) |
| 0.40  | 0.714 ( $\pm 0.00$ )        | 0.532 ( $\pm 0.00$ ) | 0.700 ( $\pm 0.00$ ) | 0.805 ( $\pm 0.00$ )        | 0.829 ( $\pm 0.00$ )        | 0.712 ( $\pm 0.00$ ) | 0.797 ( $\pm 0.00$ )        | <b>0.833</b> ( $\pm 0.00$ ) |
| 0.50  | 0.666 ( $\pm 0.00$ )        | 0.553 ( $\pm 0.00$ ) | 0.669 ( $\pm 0.00$ ) | 0.801 ( $\pm 0.00$ )        | <b>0.805</b> ( $\pm 0.00$ ) | 0.711 ( $\pm 0.00$ ) | 0.802 ( $\pm 0.00$ )        | 0.767 ( $\pm 0.00$ )        |
| 0.60  | 0.663 ( $\pm 0.00$ )        | 0.452 ( $\pm 0.00$ ) | 0.691 ( $\pm 0.00$ ) | <b>0.775</b> ( $\pm 0.00$ ) | 0.762 ( $\pm 0.00$ )        | 0.701 ( $\pm 0.00$ ) | 0.767 ( $\pm 0.00$ )        | 0.744 ( $\pm 0.00$ )        |
| 0.70  | 0.714 ( $\pm 0.00$ )        | 0.495 ( $\pm 0.00$ ) | 0.686 ( $\pm 0.00$ ) | 0.724 ( $\pm 0.00$ )        | 0.736 ( $\pm 0.00$ )        | 0.656 ( $\pm 0.00$ ) | <b>0.754</b> ( $\pm 0.00$ ) | 0.736 ( $\pm 0.00$ )        |
| 0.80  | 0.666 ( $\pm 0.00$ )        | 0.559 ( $\pm 0.00$ ) | 0.667 ( $\pm 0.00$ ) | 0.712 ( $\pm 0.00$ )        | 0.677 ( $\pm 0.00$ )        | 0.647 ( $\pm 0.00$ ) | 0.637 ( $\pm 0.00$ )        | <b>0.713</b> ( $\pm 0.00$ ) |
| 0.90  | 0.700 ( $\pm 0.00$ )        | 0.541 ( $\pm 0.00$ ) | 0.670 ( $\pm 0.00$ ) | 0.585 ( $\pm 0.00$ )        | 0.593 ( $\pm 0.00$ )        | 0.669 ( $\pm 0.00$ ) | 0.619 ( $\pm 0.00$ )        | <b>0.705</b> ( $\pm 0.00$ ) |
| 0.99  | <b>0.693</b> ( $\pm 0.00$ ) | 0.409 ( $\pm 0.00$ ) | 0.658 ( $\pm 0.00$ ) | 0.436 ( $\pm 0.00$ )        | 0.384 ( $\pm 0.00$ )        | 0.651 ( $\pm 0.00$ ) | 0.431 ( $\pm 0.00$ )        | 0.664 ( $\pm 0.00$ )        |

Table 27: F1 scores for AIR under mechanism *S-MCAR* and varying  $\mu$ 

| $\mu$ | GOODIE               | GSPN                 | FairAC                      | FP                   | GNNmi                       | GCNmf                       | PCFI                        | GNNmim                      |
|-------|----------------------|----------------------|-----------------------------|----------------------|-----------------------------|-----------------------------|-----------------------------|-----------------------------|
| 0.00  | 0.724 ( $\pm 0.00$ ) | 0.798 ( $\pm 0.02$ ) | 0.733 ( $\pm 0.00$ )        | 0.918 ( $\pm 0.00$ ) | 0.922 ( $\pm 0.01$ )        | 0.922 ( $\pm 0.00$ )        | 0.891 ( $\pm 0.00$ )        | <b>0.930</b> ( $\pm 0.00$ ) |
| 0.10  | 0.568 ( $\pm 0.00$ ) | 0.644 ( $\pm 0.00$ ) | 0.733 ( $\pm 0.00$ )        | 0.891 ( $\pm 0.00$ ) | <b>0.899</b> ( $\pm 0.00$ ) | 0.895 ( $\pm 0.00$ )        | 0.872 ( $\pm 0.00$ )        | 0.891 ( $\pm 0.00$ )        |
| 0.20  | 0.573 ( $\pm 0.00$ ) | 0.597 ( $\pm 0.00$ ) | 0.733 ( $\pm 0.00$ )        | 0.860 ( $\pm 0.00$ ) | 0.883 ( $\pm 0.00$ )        | 0.851 ( $\pm 0.00$ )        | <b>0.899</b> ( $\pm 0.00$ ) | 0.890 ( $\pm 0.00$ )        |
| 0.30  | 0.630 ( $\pm 0.00$ ) | 0.527 ( $\pm 0.00$ ) | 0.665 ( $\pm 0.00$ )        | 0.850 ( $\pm 0.00$ ) | 0.847 ( $\pm 0.00$ )        | 0.820 ( $\pm 0.00$ )        | <b>0.852</b> ( $\pm 0.00$ ) | 0.835 ( $\pm 0.00$ )        |
| 0.40  | 0.571 ( $\pm 0.00$ ) | 0.508 ( $\pm 0.00$ ) | 0.728 ( $\pm 0.00$ )        | 0.819 ( $\pm 0.00$ ) | 0.819 ( $\pm 0.00$ )        | 0.795 ( $\pm 0.00$ )        | 0.826 ( $\pm 0.00$ )        | <b>0.842</b> ( $\pm 0.00$ ) |
| 0.50  | 0.562 ( $\pm 0.00$ ) | 0.530 ( $\pm 0.00$ ) | 0.742 ( $\pm 0.00$ )        | 0.787 ( $\pm 0.00$ ) | 0.770 ( $\pm 0.00$ )        | <b>0.829</b> ( $\pm 0.00$ ) | 0.799 ( $\pm 0.00$ )        | 0.817 ( $\pm 0.00$ )        |
| 0.60  | 0.549 ( $\pm 0.00$ ) | 0.532 ( $\pm 0.00$ ) | 0.739 ( $\pm 0.00$ )        | 0.750 ( $\pm 0.00$ ) | 0.737 ( $\pm 0.00$ )        | <b>0.809</b> ( $\pm 0.00$ ) | 0.761 ( $\pm 0.00$ )        | 0.797 ( $\pm 0.00$ )        |
| 0.70  | 0.603 ( $\pm 0.00$ ) | 0.532 ( $\pm 0.00$ ) | 0.706 ( $\pm 0.00$ )        | 0.686 ( $\pm 0.00$ ) | 0.661 ( $\pm 0.00$ )        | <b>0.767</b> ( $\pm 0.00$ ) | 0.666 ( $\pm 0.00$ )        | 0.756 ( $\pm 0.00$ )        |
| 0.80  | 0.610 ( $\pm 0.00$ ) | 0.476 ( $\pm 0.00$ ) | 0.657 ( $\pm 0.00$ )        | 0.607 ( $\pm 0.00$ ) | 0.605 ( $\pm 0.00$ )        | 0.721 ( $\pm 0.00$ )        | 0.601 ( $\pm 0.00$ )        | <b>0.734</b> ( $\pm 0.00$ ) |
| 0.90  | 0.504 ( $\pm 0.00$ ) | 0.389 ( $\pm 0.00$ ) | 0.692 ( $\pm 0.00$ )        | 0.549 ( $\pm 0.00$ ) | 0.505 ( $\pm 0.00$ )        | 0.677 ( $\pm 0.00$ )        | 0.522 ( $\pm 0.00$ )        | <b>0.699</b> ( $\pm 0.00$ ) |
| 0.99  | 0.435 ( $\pm 0.00$ ) | 0.332 ( $\pm 0.00$ ) | <b>0.652</b> ( $\pm 0.00$ ) | 0.350 ( $\pm 0.00$ ) | 0.333 ( $\pm 0.00$ )        | 0.643 ( $\pm 0.00$ )        | 0.353 ( $\pm 0.00$ )        | 0.652 ( $\pm 0.00$ )        |

Table 28: F1 scores for AIR under mechanism *LD-MCAR* and varying  $\mu$ 

| $\mu$ | GOODIE                      | GSPN                 | FairAC               | FP                   | GNNmi                | GCNmf                       | PCFI                 | GNNmim                      |
|-------|-----------------------------|----------------------|----------------------|----------------------|----------------------|-----------------------------|----------------------|-----------------------------|
| 0.00  | 0.724 ( $\pm 0.00$ )        | 0.798 ( $\pm 0.02$ ) | 0.733 ( $\pm 0.00$ ) | 0.918 ( $\pm 0.00$ ) | 0.922 ( $\pm 0.01$ ) | 0.922 ( $\pm 0.00$ )        | 0.891 ( $\pm 0.00$ ) | <b>0.930</b> ( $\pm 0.00$ ) |
| 0.10  | 0.714 ( $\pm 0.00$ )        | 0.730 ( $\pm 0.00$ ) | 0.706 ( $\pm 0.00$ ) | 0.804 ( $\pm 0.00$ ) | 0.819 ( $\pm 0.00$ ) | 0.700 ( $\pm 0.00$ )        | 0.820 ( $\pm 0.00$ ) | <b>0.876</b> ( $\pm 0.00$ ) |
| 0.20  | 0.714 ( $\pm 0.00$ )        | 0.730 ( $\pm 0.00$ ) | 0.703 ( $\pm 0.00$ ) | 0.804 ( $\pm 0.00$ ) | 0.819 ( $\pm 0.00$ ) | 0.677 ( $\pm 0.00$ )        | 0.820 ( $\pm 0.00$ ) | <b>0.887</b> ( $\pm 0.00$ ) |
| 0.30  | 0.710 ( $\pm 0.00$ )        | 0.651 ( $\pm 0.00$ ) | 0.613 ( $\pm 0.00$ ) | 0.721 ( $\pm 0.00$ ) | 0.697 ( $\pm 0.00$ ) | 0.696 ( $\pm 0.00$ )        | 0.726 ( $\pm 0.00$ ) | <b>0.744</b> ( $\pm 0.00$ ) |
| 0.40  | 0.701 ( $\pm 0.00$ )        | 0.587 ( $\pm 0.00$ ) | 0.617 ( $\pm 0.00$ ) | 0.717 ( $\pm 0.00$ ) | 0.687 ( $\pm 0.00$ ) | 0.691 ( $\pm 0.00$ )        | 0.701 ( $\pm 0.00$ ) | <b>0.794</b> ( $\pm 0.00$ ) |
| 0.50  | 0.717 ( $\pm 0.00$ )        | 0.504 ( $\pm 0.00$ ) | 0.458 ( $\pm 0.00$ ) | 0.528 ( $\pm 0.00$ ) | 0.571 ( $\pm 0.00$ ) | 0.625 ( $\pm 0.00$ )        | 0.564 ( $\pm 0.00$ ) | <b>0.722</b> ( $\pm 0.00$ ) |
| 0.60  | 0.717 ( $\pm 0.00$ )        | 0.504 ( $\pm 0.00$ ) | 0.450 ( $\pm 0.00$ ) | 0.528 ( $\pm 0.00$ ) | 0.571 ( $\pm 0.00$ ) | 0.625 ( $\pm 0.00$ )        | 0.564 ( $\pm 0.00$ ) | <b>0.737</b> ( $\pm 0.00$ ) |
| 0.70  | <b>0.717</b> ( $\pm 0.00$ ) | 0.498 ( $\pm 0.00$ ) | 0.446 ( $\pm 0.00$ ) | 0.540 ( $\pm 0.00$ ) | 0.553 ( $\pm 0.00$ ) | 0.668 ( $\pm 0.00$ )        | 0.518 ( $\pm 0.00$ ) | 0.662 ( $\pm 0.00$ )        |
| 0.80  | <b>0.703</b> ( $\pm 0.00$ ) | 0.557 ( $\pm 0.00$ ) | 0.430 ( $\pm 0.00$ ) | 0.515 ( $\pm 0.00$ ) | 0.481 ( $\pm 0.00$ ) | 0.676 ( $\pm 0.00$ )        | 0.457 ( $\pm 0.00$ ) | 0.680 ( $\pm 0.00$ )        |
| 0.90  | <b>0.703</b> ( $\pm 0.00$ ) | 0.498 ( $\pm 0.00$ ) | 0.338 ( $\pm 0.00$ ) | 0.515 ( $\pm 0.00$ ) | 0.481 ( $\pm 0.00$ ) | 0.676 ( $\pm 0.00$ )        | 0.457 ( $\pm 0.00$ ) | 0.674 ( $\pm 0.00$ )        |
| 0.99  | 0.660 ( $\pm 0.00$ )        | 0.468 ( $\pm 0.00$ ) | 0.338 ( $\pm 0.00$ ) | 0.515 ( $\pm 0.00$ ) | 0.481 ( $\pm 0.00$ ) | <b>0.682</b> ( $\pm 0.00$ ) | 0.457 ( $\pm 0.00$ ) | 0.673 ( $\pm 0.00$ )        |

Table 29: F1 scores for AIR under mechanism *FD-MNAR* and varying  $\mu$ 

| $\mu$ | GOODIE               | GSPN                 | FairAC               | FP                          | GNNmi                       | GCNmf                       | PCFI                 | GNNmim                      |
|-------|----------------------|----------------------|----------------------|-----------------------------|-----------------------------|-----------------------------|----------------------|-----------------------------|
| 0.00  | 0.724 ( $\pm 0.00$ ) | 0.798 ( $\pm 0.02$ ) | 0.733 ( $\pm 0.00$ ) | 0.918 ( $\pm 0.00$ )        | 0.922 ( $\pm 0.01$ )        | 0.922 ( $\pm 0.00$ )        | 0.891 ( $\pm 0.00$ ) | <b>0.930</b> ( $\pm 0.00$ ) |
| 0.10  | 0.618 ( $\pm 0.10$ ) | 0.758 ( $\pm 0.05$ ) | 0.709 ( $\pm 0.03$ ) | 0.895 ( $\pm 0.01$ )        | 0.891 ( $\pm 0.04$ )        | 0.772 ( $\pm 0.02$ )        | 0.883 ( $\pm 0.03$ ) | <b>0.906</b> ( $\pm 0.02$ ) |
| 0.20  | 0.595 ( $\pm 0.10$ ) | 0.776 ( $\pm 0.05$ ) | 0.668 ( $\pm 0.08$ ) | 0.883 ( $\pm 0.03$ )        | 0.879 ( $\pm 0.01$ )        | 0.756 ( $\pm 0.03$ )        | 0.867 ( $\pm 0.02$ ) | <b>0.887</b> ( $\pm 0.01$ ) |
| 0.30  | 0.580 ( $\pm 0.12$ ) | 0.536 ( $\pm 0.15$ ) | 0.721 ( $\pm 0.01$ ) | 0.852 ( $\pm 0.03$ )        | 0.859 ( $\pm 0.01$ )        | 0.745 ( $\pm 0.03$ )        | 0.833 ( $\pm 0.02$ ) | <b>0.875</b> ( $\pm 0.01$ ) |
| 0.40  | 0.677 ( $\pm 0.03$ ) | 0.575 ( $\pm 0.09$ ) | 0.716 ( $\pm 0.02$ ) | 0.852 ( $\pm 0.02$ )        | <b>0.855</b> ( $\pm 0.03$ ) | 0.725 ( $\pm 0.02$ )        | 0.840 ( $\pm 0.04$ ) | 0.852 ( $\pm 0.02$ )        |
| 0.50  | 0.587 ( $\pm 0.13$ ) | 0.620 ( $\pm 0.08$ ) | 0.719 ( $\pm 0.02$ ) | 0.837 ( $\pm 0.01$ )        | 0.832 ( $\pm 0.03$ )        | 0.698 ( $\pm 0.04$ )        | 0.829 ( $\pm 0.04$ ) | <b>0.852</b> ( $\pm 0.03$ ) |
| 0.60  | 0.556 ( $\pm 0.16$ ) | 0.686 ( $\pm 0.05$ ) | 0.692 ( $\pm 0.02$ ) | <b>0.837</b> ( $\pm 0.02$ ) | 0.808 ( $\pm 0.06$ )        | 0.711 ( $\pm 0.03$ )        | 0.793 ( $\pm 0.02$ ) | 0.817 ( $\pm 0.03$ )        |
| 0.70  | 0.556 ( $\pm 0.16$ ) | 0.634 ( $\pm 0.02$ ) | 0.717 ( $\pm 0.02$ ) | 0.769 ( $\pm 0.03$ )        | <b>0.779</b> ( $\pm 0.05$ ) | 0.685 ( $\pm 0.01$ )        | 0.750 ( $\pm 0.04$ ) | 0.770 ( $\pm 0.03$ )        |
| 0.80  | 0.556 ( $\pm 0.16$ ) | 0.665 ( $\pm 0.02$ ) | 0.665 ( $\pm 0.03$ ) | 0.654 ( $\pm 0.05$ )        | 0.709 ( $\pm 0.03$ )        | 0.667 ( $\pm 0.03$ )        | 0.660 ( $\pm 0.04$ ) | <b>0.786</b> ( $\pm 0.02$ ) |
| 0.90  | 0.582 ( $\pm 0.09$ ) | 0.645 ( $\pm 0.04$ ) | 0.662 ( $\pm 0.01$ ) | 0.658 ( $\pm 0.05$ )        | 0.661 ( $\pm 0.02$ )        | 0.659 ( $\pm 0.03$ )        | 0.530 ( $\pm 0.05$ ) | <b>0.710</b> ( $\pm 0.05$ ) |
| 0.99  | 0.638 ( $\pm 0.05$ ) | 0.635 ( $\pm 0.02$ ) | 0.637 ( $\pm 0.04$ ) | 0.557 ( $\pm 0.04$ )        | 0.528 ( $\pm 0.03$ )        | <b>0.674</b> ( $\pm 0.02$ ) | 0.508 ( $\pm 0.07$ ) | 0.616 ( $\pm 0.05$ )        |

Table 30: F1 scores for AIR under mechanism *CD-MNAR* and varying  $\mu$ 

| $\mu$ | GOODIE               | GSPN                 | FairAC                      | FP                          | GNNmi                | GCNmf                | PCFI                 | GNNmim                      |
|-------|----------------------|----------------------|-----------------------------|-----------------------------|----------------------|----------------------|----------------------|-----------------------------|
| 0.00  | 0.724 ( $\pm 0.00$ ) | 0.798 ( $\pm 0.02$ ) | 0.733 ( $\pm 0.00$ )        | 0.918 ( $\pm 0.00$ )        | 0.922 ( $\pm 0.01$ ) | 0.922 ( $\pm 0.00$ ) | 0.891 ( $\pm 0.00$ ) | <b>0.930</b> ( $\pm 0.00$ ) |
| 0.10  | 0.598 ( $\pm 0.11$ ) | 0.667 ( $\pm 0.02$ ) | 0.722 ( $\pm 0.02$ )        | 0.888 ( $\pm 0.05$ )        | 0.887 ( $\pm 0.04$ ) | 0.851 ( $\pm 0.01$ ) | 0.891 ( $\pm 0.03$ ) | <b>0.895</b> ( $\pm 0.04$ ) |
| 0.20  | 0.556 ( $\pm 0.16$ ) | 0.632 ( $\pm 0.19$ ) | 0.697 ( $\pm 0.02$ )        | <b>0.864</b> ( $\pm 0.02$ ) | 0.848 ( $\pm 0.06$ ) | 0.778 ( $\pm 0.04$ ) | 0.841 ( $\pm 0.01$ ) | 0.864 ( $\pm 0.01$ )        |
| 0.30  | 0.556 ( $\pm 0.16$ ) | 0.526 ( $\pm 0.13$ ) | 0.722 ( $\pm 0.03$ )        | 0.845 ( $\pm 0.01$ )        | 0.825 ( $\pm 0.04$ ) | 0.689 ( $\pm 0.02$ ) | 0.841 ( $\pm 0.03$ ) | <b>0.891</b> ( $\pm 0.04$ ) |
| 0.40  | 0.480 ( $\pm 0.16$ ) | 0.691 ( $\pm 0.14$ ) | 0.601 ( $\pm 0.12$ )        | 0.833 ( $\pm 0.02$ )        | 0.805 ( $\pm 0.03$ ) | 0.722 ( $\pm 0.02$ ) | 0.860 ( $\pm 0.03$ ) | <b>0.860</b> ( $\pm 0.03$ ) |
| 0.50  | 0.536 ( $\pm 0.16$ ) | 0.607 ( $\pm 0.09$ ) | 0.705 ( $\pm 0.02$ )        | 0.813 ( $\pm 0.02$ )        | 0.769 ( $\pm 0.04$ ) | 0.674 ( $\pm 0.01$ ) | 0.783 ( $\pm 0.04$ ) | <b>0.833</b> ( $\pm 0.03$ ) |
| 0.60  | 0.622 ( $\pm 0.06$ ) | 0.636 ( $\pm 0.04$ ) | 0.694 ( $\pm 0.01$ )        | 0.758 ( $\pm 0.05$ )        | 0.708 ( $\pm 0.07$ ) | 0.681 ( $\pm 0.01$ ) | 0.766 ( $\pm 0.06$ ) | <b>0.766</b> ( $\pm 0.06$ ) |
| 0.70  | 0.580 ( $\pm 0.10$ ) | 0.672 ( $\pm 0.07$ ) | 0.681 ( $\pm 0.01$ )        | <b>0.757</b> ( $\pm 0.03$ ) | 0.724 ( $\pm 0.04$ ) | 0.644 ( $\pm 0.02$ ) | 0.753 ( $\pm 0.05$ ) | 0.726 ( $\pm 0.05$ )        |
| 0.80  | 0.563 ( $\pm 0.12$ ) | 0.681 ( $\pm 0.05$ ) | 0.676 ( $\pm 0.01$ )        | 0.733 ( $\pm 0.02$ )        | 0.655 ( $\pm 0.02$ ) | 0.658 ( $\pm 0.02$ ) | 0.712 ( $\pm 0.01$ ) | <b>0.769</b> ( $\pm 0.03$ ) |
| 0.90  | 0.655 ( $\pm 0.03$ ) | 0.615 ( $\pm 0.04$ ) | 0.653 ( $\pm 0.01$ )        | <b>0.693</b> ( $\pm 0.04$ ) | 0.579 ( $\pm 0.04$ ) | 0.643 ( $\pm 0.04$ ) | 0.692 ( $\pm 0.06$ ) | 0.668 ( $\pm 0.02$ )        |
| 0.99  | 0.654 ( $\pm 0.03$ ) | 0.522 ( $\pm 0.04$ ) | <b>0.660</b> ( $\pm 0.05$ ) | 0.524 ( $\pm 0.07$ )        | 0.473 ( $\pm 0.05$ ) | 0.650 ( $\pm 0.06$ ) | 0.424 ( $\pm 0.06$ ) | 0.631 ( $\pm 0.07$ )        |

Table 31: F1 scores for ELECTRIC under mechanism *U-MCAR* and varying  $\mu$ 

| $\mu$ | GOODIE               | GSPN                 | FairAC                      | FP                   | GNNmi                | GCNmf                       | PCFI                 | GNNmim               |
|-------|----------------------|----------------------|-----------------------------|----------------------|----------------------|-----------------------------|----------------------|----------------------|
| 0.00  | 0.588 ( $\pm 0.00$ ) | 0.915 ( $\pm 0.00$ ) | <b>0.963</b> ( $\pm 0.01$ ) | 0.885 ( $\pm 0.00$ ) | 0.929 ( $\pm 0.00$ ) | 0.861 ( $\pm 0.00$ )        | 0.903 ( $\pm 0.00$ ) | 0.938 ( $\pm 0.01$ ) |
| 0.10  | 0.589 ( $\pm 0.00$ ) | 0.827 ( $\pm 0.00$ ) | <b>0.931</b> ( $\pm 0.00$ ) | 0.865 ( $\pm 0.00$ ) | 0.864 ( $\pm 0.00$ ) | 0.887 ( $\pm 0.00$ )        | 0.889 ( $\pm 0.00$ ) | 0.923 ( $\pm 0.00$ ) |
| 0.20  | 0.589 ( $\pm 0.00$ ) | 0.806 ( $\pm 0.00$ ) | <b>0.935</b> ( $\pm 0.00$ ) | 0.821 ( $\pm 0.00$ ) | 0.807 ( $\pm 0.00$ ) | 0.876 ( $\pm 0.00$ )        | 0.877 ( $\pm 0.00$ ) | 0.877 ( $\pm 0.00$ ) |
| 0.30  | 0.588 ( $\pm 0.00$ ) | 0.770 ( $\pm 0.00$ ) | <b>0.924</b> ( $\pm 0.00$ ) | 0.758 ( $\pm 0.00$ ) | 0.780 ( $\pm 0.00$ ) | 0.889 ( $\pm 0.00$ )        | 0.872 ( $\pm 0.00$ ) | 0.868 ( $\pm 0.00$ ) |
| 0.40  | 0.590 ( $\pm 0.00$ ) | 0.703 ( $\pm 0.00$ ) | <b>0.906</b> ( $\pm 0.00$ ) | 0.711 ( $\pm 0.00$ ) | 0.728 ( $\pm 0.00$ ) | 0.874 ( $\pm 0.00$ )        | 0.865 ( $\pm 0.00$ ) | 0.859 ( $\pm 0.00$ ) |
| 0.50  | 0.587 ( $\pm 0.00$ ) | 0.626 ( $\pm 0.00$ ) | <b>0.922</b> ( $\pm 0.00$ ) | 0.676 ( $\pm 0.00$ ) | 0.693 ( $\pm 0.00$ ) | 0.864 ( $\pm 0.00$ )        | 0.841 ( $\pm 0.00$ ) | 0.804 ( $\pm 0.00$ ) |
| 0.60  | 0.584 ( $\pm 0.00$ ) | 0.567 ( $\pm 0.00$ ) | <b>0.881</b> ( $\pm 0.00$ ) | 0.598 ( $\pm 0.00$ ) | 0.614 ( $\pm 0.00$ ) | 0.877 ( $\pm 0.00$ )        | 0.793 ( $\pm 0.00$ ) | 0.779 ( $\pm 0.00$ ) |
| 0.70  | 0.582 ( $\pm 0.00$ ) | 0.506 ( $\pm 0.00$ ) | <b>0.868</b> ( $\pm 0.00$ ) | 0.548 ( $\pm 0.00$ ) | 0.553 ( $\pm 0.00$ ) | 0.831 ( $\pm 0.00$ )        | 0.771 ( $\pm 0.00$ ) | 0.766 ( $\pm 0.00$ ) |
| 0.80  | 0.592 ( $\pm 0.00$ ) | 0.397 ( $\pm 0.00$ ) | <b>0.852</b> ( $\pm 0.00$ ) | 0.496 ( $\pm 0.00$ ) | 0.522 ( $\pm 0.00$ ) | 0.807 ( $\pm 0.00$ )        | 0.730 ( $\pm 0.00$ ) | 0.728 ( $\pm 0.00$ ) |
| 0.90  | 0.593 ( $\pm 0.00$ ) | 0.389 ( $\pm 0.00$ ) | <b>0.744</b> ( $\pm 0.00$ ) | 0.361 ( $\pm 0.00$ ) | 0.423 ( $\pm 0.00$ ) | 0.701 ( $\pm 0.00$ )        | 0.628 ( $\pm 0.00$ ) | 0.646 ( $\pm 0.00$ ) |
| 0.99  | 0.592 ( $\pm 0.00$ ) | 0.289 ( $\pm 0.00$ ) | 0.260 ( $\pm 0.00$ )        | 0.285 ( $\pm 0.00$ ) | 0.282 ( $\pm 0.00$ ) | <b>0.630</b> ( $\pm 0.00$ ) | 0.333 ( $\pm 0.00$ ) | 0.412 ( $\pm 0.00$ ) |

Table 32: F1 scores for ELECTRIC under mechanism *S-MCAR* and varying  $\mu$ 

| $\mu$ | GOODIE               | GSPN                 | FairAC                      | FP                   | GNNmi                | GCNmf                       | PCFI                 | GNNmim               |
|-------|----------------------|----------------------|-----------------------------|----------------------|----------------------|-----------------------------|----------------------|----------------------|
| 0.00  | 0.588 ( $\pm 0.00$ ) | 0.915 ( $\pm 0.00$ ) | <b>0.963</b> ( $\pm 0.01$ ) | 0.885 ( $\pm 0.00$ ) | 0.929 ( $\pm 0.00$ ) | 0.861 ( $\pm 0.00$ )        | 0.903 ( $\pm 0.00$ ) | 0.938 ( $\pm 0.01$ ) |
| 0.10  | 0.493 ( $\pm 0.00$ ) | 0.891 ( $\pm 0.00$ ) | <b>0.959</b> ( $\pm 0.00$ ) | 0.831 ( $\pm 0.00$ ) | 0.853 ( $\pm 0.00$ ) | 0.862 ( $\pm 0.00$ )        | 0.854 ( $\pm 0.00$ ) | 0.904 ( $\pm 0.00$ ) |
| 0.20  | 0.484 ( $\pm 0.00$ ) | 0.855 ( $\pm 0.00$ ) | <b>0.945</b> ( $\pm 0.00$ ) | 0.821 ( $\pm 0.00$ ) | 0.851 ( $\pm 0.00$ ) | 0.867 ( $\pm 0.00$ )        | 0.870 ( $\pm 0.00$ ) | 0.878 ( $\pm 0.00$ ) |
| 0.30  | 0.478 ( $\pm 0.00$ ) | 0.816 ( $\pm 0.00$ ) | <b>0.935</b> ( $\pm 0.00$ ) | 0.768 ( $\pm 0.00$ ) | 0.796 ( $\pm 0.00$ ) | 0.872 ( $\pm 0.00$ )        | 0.856 ( $\pm 0.00$ ) | 0.855 ( $\pm 0.00$ ) |
| 0.40  | 0.483 ( $\pm 0.00$ ) | 0.756 ( $\pm 0.00$ ) | <b>0.940</b> ( $\pm 0.00$ ) | 0.703 ( $\pm 0.00$ ) | 0.734 ( $\pm 0.00$ ) | 0.842 ( $\pm 0.00$ )        | 0.871 ( $\pm 0.00$ ) | 0.801 ( $\pm 0.00$ ) |
| 0.50  | 0.431 ( $\pm 0.00$ ) | 0.708 ( $\pm 0.00$ ) | <b>0.926</b> ( $\pm 0.00$ ) | 0.656 ( $\pm 0.00$ ) | 0.665 ( $\pm 0.00$ ) | 0.839 ( $\pm 0.00$ )        | 0.844 ( $\pm 0.00$ ) | 0.810 ( $\pm 0.00$ ) |
| 0.60  | 0.397 ( $\pm 0.00$ ) | 0.632 ( $\pm 0.00$ ) | <b>0.898</b> ( $\pm 0.00$ ) | 0.619 ( $\pm 0.00$ ) | 0.617 ( $\pm 0.00$ ) | 0.813 ( $\pm 0.00$ )        | 0.808 ( $\pm 0.00$ ) | 0.787 ( $\pm 0.00$ ) |
| 0.70  | 0.435 ( $\pm 0.00$ ) | 0.563 ( $\pm 0.00$ ) | <b>0.870</b> ( $\pm 0.00$ ) | 0.528 ( $\pm 0.00$ ) | 0.545 ( $\pm 0.00$ ) | 0.799 ( $\pm 0.00$ )        | 0.776 ( $\pm 0.00$ ) | 0.711 ( $\pm 0.00$ ) |
| 0.80  | 0.490 ( $\pm 0.00$ ) | 0.522 ( $\pm 0.00$ ) | <b>0.806</b> ( $\pm 0.00$ ) | 0.475 ( $\pm 0.00$ ) | 0.455 ( $\pm 0.00$ ) | 0.764 ( $\pm 0.00$ )        | 0.770 ( $\pm 0.00$ ) | 0.676 ( $\pm 0.00$ ) |
| 0.90  | 0.374 ( $\pm 0.00$ ) | 0.392 ( $\pm 0.00$ ) | <b>0.771</b> ( $\pm 0.00$ ) | 0.420 ( $\pm 0.00$ ) | 0.394 ( $\pm 0.00$ ) | 0.738 ( $\pm 0.00$ )        | 0.496 ( $\pm 0.00$ ) | 0.567 ( $\pm 0.00$ ) |
| 0.99  | 0.260 ( $\pm 0.00$ ) | 0.265 ( $\pm 0.00$ ) | 0.260 ( $\pm 0.00$ )        | 0.269 ( $\pm 0.00$ ) | 0.277 ( $\pm 0.00$ ) | <b>0.639</b> ( $\pm 0.00$ ) | 0.285 ( $\pm 0.00$ ) | 0.479 ( $\pm 0.00$ ) |

Table 33: F1 scores for ELECTRIC under mechanism *LD-MCAR* and varying  $\mu$ 

| $\mu$ | GOODIE               | GSPN                 | FairAC                      | FP                   | GNNmi                | GCNmf                       | PCFI                        | GNNmim               |
|-------|----------------------|----------------------|-----------------------------|----------------------|----------------------|-----------------------------|-----------------------------|----------------------|
| 0.00  | 0.588 ( $\pm 0.00$ ) | 0.915 ( $\pm 0.00$ ) | <b>0.963</b> ( $\pm 0.01$ ) | 0.885 ( $\pm 0.00$ ) | 0.929 ( $\pm 0.00$ ) | 0.861 ( $\pm 0.00$ )        | 0.903 ( $\pm 0.00$ )        | 0.920 ( $\pm 0.00$ ) |
| 0.10  | 0.585 ( $\pm 0.00$ ) | 0.794 ( $\pm 0.00$ ) | <b>0.910</b> ( $\pm 0.00$ ) | 0.828 ( $\pm 0.00$ ) | 0.843 ( $\pm 0.00$ ) | 0.890 ( $\pm 0.00$ )        | 0.894 ( $\pm 0.00$ )        | 0.867 ( $\pm 0.00$ ) |
| 0.20  | 0.584 ( $\pm 0.00$ ) | 0.687 ( $\pm 0.00$ ) | <b>0.920</b> ( $\pm 0.00$ ) | 0.710 ( $\pm 0.00$ ) | 0.762 ( $\pm 0.00$ ) | 0.860 ( $\pm 0.00$ )        | 0.842 ( $\pm 0.00$ )        | 0.815 ( $\pm 0.00$ ) |
| 0.30  | 0.591 ( $\pm 0.00$ ) | 0.604 ( $\pm 0.00$ ) | 0.650 ( $\pm 0.00$ )        | 0.672 ( $\pm 0.00$ ) | 0.693 ( $\pm 0.00$ ) | 0.815 ( $\pm 0.00$ )        | <b>0.820</b> ( $\pm 0.00$ ) | 0.793 ( $\pm 0.00$ ) |
| 0.40  | 0.587 ( $\pm 0.00$ ) | 0.475 ( $\pm 0.00$ ) | 0.630 ( $\pm 0.00$ )        | 0.475 ( $\pm 0.00$ ) | 0.494 ( $\pm 0.00$ ) | <b>0.729</b> ( $\pm 0.00$ ) | 0.723 ( $\pm 0.00$ )        | 0.685 ( $\pm 0.00$ ) |
| 0.50  | 0.589 ( $\pm 0.00$ ) | 0.301 ( $\pm 0.00$ ) | <b>0.630</b> ( $\pm 0.00$ ) | 0.260 ( $\pm 0.00$ ) | 0.260 ( $\pm 0.00$ ) | 0.630 ( $\pm 0.00$ )        | 0.260 ( $\pm 0.00$ )        | 0.532 ( $\pm 0.00$ ) |
| 0.60  | 0.593 ( $\pm 0.00$ ) | 0.271 ( $\pm 0.00$ ) | <b>0.630</b> ( $\pm 0.00$ ) | 0.260 ( $\pm 0.00$ ) | 0.260 ( $\pm 0.00$ ) | 0.630 ( $\pm 0.00$ )        | 0.260 ( $\pm 0.00$ )        | 0.517 ( $\pm 0.00$ ) |
| 0.70  | 0.589 ( $\pm 0.00$ ) | 0.310 ( $\pm 0.00$ ) | 0.260 ( $\pm 0.00$ )        | 0.260 ( $\pm 0.00$ ) | 0.260 ( $\pm 0.00$ ) | <b>0.629</b> ( $\pm 0.00$ ) | 0.260 ( $\pm 0.00$ )        | 0.571 ( $\pm 0.00$ ) |
| 0.80  | 0.593 ( $\pm 0.00$ ) | 0.343 ( $\pm 0.00$ ) | 0.260 ( $\pm 0.00$ )        | 0.260 ( $\pm 0.00$ ) | 0.263 ( $\pm 0.00$ ) | <b>0.630</b> ( $\pm 0.00$ ) | 0.260 ( $\pm 0.00$ )        | 0.544 ( $\pm 0.00$ ) |
| 0.90  | 0.589 ( $\pm 0.00$ ) | 0.315 ( $\pm 0.00$ ) | 0.260 ( $\pm 0.00$ )        | 0.260 ( $\pm 0.00$ ) | 0.263 ( $\pm 0.00$ ) | <b>0.630</b> ( $\pm 0.00$ ) | 0.260 ( $\pm 0.00$ )        | 0.538 ( $\pm 0.00$ ) |
| 0.99  | 0.589 ( $\pm 0.00$ ) | 0.330 ( $\pm 0.00$ ) | 0.260 ( $\pm 0.00$ )        | 0.260 ( $\pm 0.00$ ) | 0.260 ( $\pm 0.00$ ) | <b>0.630</b> ( $\pm 0.00$ ) | 0.260 ( $\pm 0.00$ )        | 0.552 ( $\pm 0.00$ ) |

Table 34: F1 scores for ELECTRIC under mechanism *FD-MNAR* and varying  $\mu$ 

| $\mu$ | GOODIE               | GSPN                 | FairAC                      | FP                   | GNNmi                | GCNmf                       | PCFI                 | GNNmim               |
|-------|----------------------|----------------------|-----------------------------|----------------------|----------------------|-----------------------------|----------------------|----------------------|
| 0.00  | 0.588 ( $\pm 0.00$ ) | 0.915 ( $\pm 0.00$ ) | <b>0.963</b> ( $\pm 0.01$ ) | 0.885 ( $\pm 0.00$ ) | 0.929 ( $\pm 0.00$ ) | 0.861 ( $\pm 0.00$ )        | 0.903 ( $\pm 0.00$ ) | 0.938 ( $\pm 0.01$ ) |
| 0.10  | 0.468 ( $\pm 0.15$ ) | 0.879 ( $\pm 0.01$ ) | <b>0.944</b> ( $\pm 0.02$ ) | 0.862 ( $\pm 0.03$ ) | 0.844 ( $\pm 0.02$ ) | 0.878 ( $\pm 0.03$ )        | 0.870 ( $\pm 0.04$ ) | 0.916 ( $\pm 0.01$ ) |
| 0.20  | 0.491 ( $\pm 0.13$ ) | 0.850 ( $\pm 0.01$ ) | <b>0.938</b> ( $\pm 0.01$ ) | 0.808 ( $\pm 0.02$ ) | 0.813 ( $\pm 0.02$ ) | 0.867 ( $\pm 0.01$ )        | 0.859 ( $\pm 0.02$ ) | 0.906 ( $\pm 0.00$ ) |
| 0.30  | 0.496 ( $\pm 0.13$ ) | 0.800 ( $\pm 0.02$ ) | <b>0.922</b> ( $\pm 0.03$ ) | 0.744 ( $\pm 0.02$ ) | 0.793 ( $\pm 0.01$ ) | 0.864 ( $\pm 0.03$ )        | 0.861 ( $\pm 0.01$ ) | 0.877 ( $\pm 0.01$ ) |
| 0.40  | 0.506 ( $\pm 0.12$ ) | 0.772 ( $\pm 0.04$ ) | <b>0.906</b> ( $\pm 0.03$ ) | 0.701 ( $\pm 0.03$ ) | 0.751 ( $\pm 0.03$ ) | 0.850 ( $\pm 0.02$ )        | 0.839 ( $\pm 0.01$ ) | 0.864 ( $\pm 0.01$ ) |
| 0.50  | 0.438 ( $\pm 0.12$ ) | 0.743 ( $\pm 0.01$ ) | <b>0.877</b> ( $\pm 0.01$ ) | 0.648 ( $\pm 0.03$ ) | 0.707 ( $\pm 0.02$ ) | 0.842 ( $\pm 0.02$ )        | 0.817 ( $\pm 0.03$ ) | 0.837 ( $\pm 0.02$ ) |
| 0.60  | 0.331 ( $\pm 0.05$ ) | 0.688 ( $\pm 0.02$ ) | <b>0.836</b> ( $\pm 0.03$ ) | 0.594 ( $\pm 0.02$ ) | 0.663 ( $\pm 0.01$ ) | 0.807 ( $\pm 0.05$ )        | 0.775 ( $\pm 0.02$ ) | 0.806 ( $\pm 0.01$ ) |
| 0.70  | 0.461 ( $\pm 0.14$ ) | 0.626 ( $\pm 0.01$ ) | <b>0.834</b> ( $\pm 0.04$ ) | 0.514 ( $\pm 0.04$ ) | 0.590 ( $\pm 0.02$ ) | 0.776 ( $\pm 0.02$ )        | 0.761 ( $\pm 0.02$ ) | 0.760 ( $\pm 0.02$ ) |
| 0.80  | 0.435 ( $\pm 0.12$ ) | 0.570 ( $\pm 0.02$ ) | 0.742 ( $\pm 0.06$ )        | 0.463 ( $\pm 0.01$ ) | 0.490 ( $\pm 0.04$ ) | <b>0.743</b> ( $\pm 0.04$ ) | 0.700 ( $\pm 0.01$ ) | 0.707 ( $\pm 0.01$ ) |
| 0.90  | 0.275 ( $\pm 0.01$ ) | 0.484 ( $\pm 0.01$ ) | 0.560 ( $\pm 0.22$ )        | 0.330 ( $\pm 0.06$ ) | 0.426 ( $\pm 0.03$ ) | <b>0.663</b> ( $\pm 0.03$ ) | 0.500 ( $\pm 0.17$ ) | 0.620 ( $\pm 0.02$ ) |
| 0.99  | 0.342 ( $\pm 0.12$ ) | 0.377 ( $\pm 0.03$ ) | 0.260 ( $\pm 0.00$ )        | 0.260 ( $\pm 0.00$ ) | 0.347 ( $\pm 0.01$ ) | <b>0.629</b> ( $\pm 0.00$ ) | 0.274 ( $\pm 0.01$ ) | 0.537 ( $\pm 0.08$ ) |

Table 35: F1 scores for ELECTRIC under mechanism *CD-MNAR* and varying  $\mu$ 

| $\mu$ | GOODIE               | GSPN                 | FairAC                      | FP                   | GNNmi                | GCNmf                       | PCFI                 | GNNmim               |
|-------|----------------------|----------------------|-----------------------------|----------------------|----------------------|-----------------------------|----------------------|----------------------|
| 0.00  | 0.588 ( $\pm 0.00$ ) | 0.915 ( $\pm 0.00$ ) | <b>0.963</b> ( $\pm 0.01$ ) | 0.885 ( $\pm 0.00$ ) | 0.929 ( $\pm 0.00$ ) | 0.861 ( $\pm 0.00$ )        | 0.903 ( $\pm 0.00$ ) | 0.938 ( $\pm 0.01$ ) |
| 0.10  | 0.486 ( $\pm 0.12$ ) | 0.888 ( $\pm 0.01$ ) | <b>0.962</b> ( $\pm 0.01$ ) | 0.869 ( $\pm 0.01$ ) | 0.874 ( $\pm 0.01$ ) | 0.908 ( $\pm 0.02$ )        | 0.885 ( $\pm 0.03$ ) | 0.922 ( $\pm 0.00$ ) |
| 0.20  | 0.476 ( $\pm 0.15$ ) | 0.851 ( $\pm 0.02$ ) | <b>0.931</b> ( $\pm 0.02$ ) | 0.815 ( $\pm 0.01$ ) | 0.802 ( $\pm 0.01$ ) | 0.879 ( $\pm 0.01$ )        | 0.879 ( $\pm 0.01$ ) | 0.902 ( $\pm 0.03$ ) |
| 0.30  | 0.478 ( $\pm 0.16$ ) | 0.819 ( $\pm 0.04$ ) | <b>0.922</b> ( $\pm 0.00$ ) | 0.789 ( $\pm 0.03$ ) | 0.789 ( $\pm 0.01$ ) | 0.872 ( $\pm 0.01$ )        | 0.880 ( $\pm 0.01$ ) | 0.890 ( $\pm 0.00$ ) |
| 0.40  | 0.431 ( $\pm 0.11$ ) | 0.807 ( $\pm 0.02$ ) | <b>0.902</b> ( $\pm 0.01$ ) | 0.775 ( $\pm 0.01$ ) | 0.762 ( $\pm 0.01$ ) | 0.835 ( $\pm 0.02$ )        | 0.865 ( $\pm 0.02$ ) | 0.869 ( $\pm 0.02$ ) |
| 0.50  | 0.450 ( $\pm 0.09$ ) | 0.758 ( $\pm 0.02$ ) | <b>0.867</b> ( $\pm 0.03$ ) | 0.722 ( $\pm 0.02$ ) | 0.748 ( $\pm 0.01$ ) | 0.835 ( $\pm 0.03$ )        | 0.827 ( $\pm 0.03$ ) | 0.850 ( $\pm 0.02$ ) |
| 0.60  | 0.436 ( $\pm 0.10$ ) | 0.706 ( $\pm 0.01$ ) | <b>0.853</b> ( $\pm 0.05$ ) | 0.663 ( $\pm 0.02$ ) | 0.608 ( $\pm 0.01$ ) | 0.847 ( $\pm 0.03$ )        | 0.780 ( $\pm 0.02$ ) | 0.836 ( $\pm 0.02$ ) |
| 0.70  | 0.337 ( $\pm 0.03$ ) | 0.604 ( $\pm 0.03$ ) | <b>0.812</b> ( $\pm 0.03$ ) | 0.585 ( $\pm 0.03$ ) | 0.538 ( $\pm 0.03$ ) | 0.770 ( $\pm 0.09$ )        | 0.729 ( $\pm 0.01$ ) | 0.765 ( $\pm 0.01$ ) |
| 0.80  | 0.411 ( $\pm 0.09$ ) | 0.594 ( $\pm 0.02$ ) | <b>0.824</b> ( $\pm 0.08$ ) | 0.540 ( $\pm 0.01$ ) | 0.486 ( $\pm 0.01$ ) | 0.703 ( $\pm 0.04$ )        | 0.671 ( $\pm 0.01$ ) | 0.742 ( $\pm 0.02$ ) |
| 0.90  | 0.392 ( $\pm 0.11$ ) | 0.531 ( $\pm 0.02$ ) | <b>0.735</b> ( $\pm 0.07$ ) | 0.473 ( $\pm 0.03$ ) | 0.449 ( $\pm 0.02$ ) | 0.686 ( $\pm 0.06$ )        | 0.600 ( $\pm 0.04$ ) | 0.683 ( $\pm 0.02$ ) |
| 0.99  | 0.304 ( $\pm 0.02$ ) | 0.329 ( $\pm 0.04$ ) | 0.264 ( $\pm 0.01$ )        | 0.303 ( $\pm 0.02$ ) | 0.294 ( $\pm 0.01$ ) | <b>0.629</b> ( $\pm 0.00$ ) | 0.312 ( $\pm 0.04$ ) | 0.561 ( $\pm 0.02$ ) |

Table 36: F1 scores for TADPOLE under mechanism *U-MCAR* and varying  $\mu$ 

| $\mu$ | GOODIE                      | GSPN                 | FairAC                      | FP                   | GNNmi                       | GCNmf                | PCFI                        | GNNmim                      |
|-------|-----------------------------|----------------------|-----------------------------|----------------------|-----------------------------|----------------------|-----------------------------|-----------------------------|
| 0.00  | 0.804 ( $\pm 0.00$ )        | 0.648 ( $\pm 0.01$ ) | 0.790 ( $\pm 0.00$ )        | 0.806 ( $\pm 0.00$ ) | <b>0.832</b> ( $\pm 0.02$ ) | 0.786 ( $\pm 0.00$ ) | 0.792 ( $\pm 0.00$ )        | 0.809 ( $\pm 0.00$ )        |
| 0.10  | 0.789 ( $\pm 0.00$ )        | 0.590 ( $\pm 0.00$ ) | 0.795 ( $\pm 0.00$ )        | 0.801 ( $\pm 0.00$ ) | <b>0.832</b> ( $\pm 0.00$ ) | 0.809 ( $\pm 0.00$ ) | 0.821 ( $\pm 0.00$ )        | 0.820 ( $\pm 0.00$ )        |
| 0.20  | 0.808 ( $\pm 0.00$ )        | 0.590 ( $\pm 0.00$ ) | 0.803 ( $\pm 0.00$ )        | 0.823 ( $\pm 0.00$ ) | <b>0.836</b> ( $\pm 0.00$ ) | 0.779 ( $\pm 0.00$ ) | 0.802 ( $\pm 0.00$ )        | 0.799 ( $\pm 0.00$ )        |
| 0.30  | 0.814 ( $\pm 0.00$ )        | 0.567 ( $\pm 0.00$ ) | 0.791 ( $\pm 0.00$ )        | 0.806 ( $\pm 0.00$ ) | <b>0.825</b> ( $\pm 0.00$ ) | 0.757 ( $\pm 0.00$ ) | 0.803 ( $\pm 0.00$ )        | 0.802 ( $\pm 0.00$ )        |
| 0.40  | 0.804 ( $\pm 0.00$ )        | 0.610 ( $\pm 0.00$ ) | <b>0.831</b> ( $\pm 0.00$ ) | 0.800 ( $\pm 0.00$ ) | 0.820 ( $\pm 0.00$ )        | 0.794 ( $\pm 0.00$ ) | 0.799 ( $\pm 0.00$ )        | 0.805 ( $\pm 0.00$ )        |
| 0.50  | 0.752 ( $\pm 0.00$ )        | 0.581 ( $\pm 0.00$ ) | 0.813 ( $\pm 0.00$ )        | 0.809 ( $\pm 0.00$ ) | <b>0.830</b> ( $\pm 0.00$ ) | 0.799 ( $\pm 0.00$ ) | 0.810 ( $\pm 0.00$ )        | 0.814 ( $\pm 0.00$ )        |
| 0.60  | 0.756 ( $\pm 0.00$ )        | 0.575 ( $\pm 0.00$ ) | <b>0.808</b> ( $\pm 0.00$ ) | 0.785 ( $\pm 0.00$ ) | 0.797 ( $\pm 0.00$ )        | 0.722 ( $\pm 0.00$ ) | 0.791 ( $\pm 0.00$ )        | 0.799 ( $\pm 0.00$ )        |
| 0.70  | 0.610 ( $\pm 0.00$ )        | 0.552 ( $\pm 0.00$ ) | 0.795 ( $\pm 0.00$ )        | 0.740 ( $\pm 0.00$ ) | 0.772 ( $\pm 0.00$ )        | 0.729 ( $\pm 0.00$ ) | 0.762 ( $\pm 0.00$ )        | <b>0.802</b> ( $\pm 0.00$ ) |
| 0.80  | 0.669 ( $\pm 0.00$ )        | 0.552 ( $\pm 0.00$ ) | <b>0.804</b> ( $\pm 0.00$ ) | 0.757 ( $\pm 0.00$ ) | 0.728 ( $\pm 0.00$ )        | 0.669 ( $\pm 0.00$ ) | 0.775 ( $\pm 0.00$ )        | 0.764 ( $\pm 0.00$ )        |
| 0.90  | 0.759 ( $\pm 0.00$ )        | 0.590 ( $\pm 0.00$ ) | 0.241 ( $\pm 0.00$ )        | 0.758 ( $\pm 0.00$ ) | 0.408 ( $\pm 0.00$ )        | 0.608 ( $\pm 0.00$ ) | <b>0.767</b> ( $\pm 0.00$ ) | 0.763 ( $\pm 0.00$ )        |
| 0.99  | <b>0.707</b> ( $\pm 0.00$ ) | 0.523 ( $\pm 0.00$ ) | 0.241 ( $\pm 0.00$ )        | 0.241 ( $\pm 0.00$ ) | 0.241 ( $\pm 0.00$ )        | 0.353 ( $\pm 0.00$ ) | 0.241 ( $\pm 0.00$ )        | 0.700 ( $\pm 0.00$ )        |

Table 37: F1 scores for TADPOLE under mechanism *S-MCAR* and varying  $\mu$ 

| $\mu$ | GOODIE               | GSPN                 | FairAC                      | FP                          | GNNmi                       | GCNmf                | PCFI                        | GNNmim                      |
|-------|----------------------|----------------------|-----------------------------|-----------------------------|-----------------------------|----------------------|-----------------------------|-----------------------------|
| 0.00  | 0.804 ( $\pm 0.00$ ) | 0.648 ( $\pm 0.01$ ) | 0.790 ( $\pm 0.00$ )        | 0.806 ( $\pm 0.00$ )        | <b>0.832</b> ( $\pm 0.02$ ) | 0.786 ( $\pm 0.00$ ) | 0.792 ( $\pm 0.00$ )        | 0.831 ( $\pm 0.04$ )        |
| 0.10  | 0.554 ( $\pm 0.00$ ) | 0.542 ( $\pm 0.00$ ) | 0.805 ( $\pm 0.00$ )        | 0.803 ( $\pm 0.00$ )        | <b>0.815</b> ( $\pm 0.00$ ) | 0.751 ( $\pm 0.00$ ) | 0.804 ( $\pm 0.00$ )        | 0.810 ( $\pm 0.00$ )        |
| 0.20  | 0.497 ( $\pm 0.00$ ) | 0.486 ( $\pm 0.00$ ) | <b>0.818</b> ( $\pm 0.00$ ) | 0.818 ( $\pm 0.00$ )        | 0.811 ( $\pm 0.00$ )        | 0.737 ( $\pm 0.00$ ) | 0.814 ( $\pm 0.00$ )        | 0.794 ( $\pm 0.00$ )        |
| 0.30  | 0.523 ( $\pm 0.00$ ) | 0.502 ( $\pm 0.00$ ) | 0.775 ( $\pm 0.00$ )        | 0.799 ( $\pm 0.00$ )        | <b>0.825</b> ( $\pm 0.00$ ) | 0.777 ( $\pm 0.00$ ) | 0.818 ( $\pm 0.00$ )        | 0.775 ( $\pm 0.00$ )        |
| 0.40  | 0.482 ( $\pm 0.00$ ) | 0.581 ( $\pm 0.00$ ) | <b>0.800</b> ( $\pm 0.00$ ) | 0.797 ( $\pm 0.00$ )        | 0.794 ( $\pm 0.00$ )        | 0.719 ( $\pm 0.00$ ) | 0.784 ( $\pm 0.00$ )        | 0.790 ( $\pm 0.00$ )        |
| 0.50  | 0.501 ( $\pm 0.00$ ) | 0.523 ( $\pm 0.00$ ) | 0.757 ( $\pm 0.00$ )        | 0.777 ( $\pm 0.00$ )        | 0.769 ( $\pm 0.00$ )        | 0.739 ( $\pm 0.00$ ) | <b>0.798</b> ( $\pm 0.00$ ) | 0.795 ( $\pm 0.00$ )        |
| 0.60  | 0.539 ( $\pm 0.00$ ) | 0.498 ( $\pm 0.00$ ) | 0.802 ( $\pm 0.00$ )        | 0.769 ( $\pm 0.00$ )        | 0.734 ( $\pm 0.00$ )        | 0.693 ( $\pm 0.00$ ) | 0.804 ( $\pm 0.00$ )        | <b>0.816</b> ( $\pm 0.00$ ) |
| 0.70  | 0.480 ( $\pm 0.00$ ) | 0.453 ( $\pm 0.00$ ) | 0.748 ( $\pm 0.00$ )        | 0.719 ( $\pm 0.00$ )        | 0.738 ( $\pm 0.00$ )        | 0.642 ( $\pm 0.00$ ) | 0.752 ( $\pm 0.00$ )        | <b>0.795</b> ( $\pm 0.00$ ) |
| 0.80  | 0.502 ( $\pm 0.00$ ) | 0.422 ( $\pm 0.00$ ) | 0.689 ( $\pm 0.00$ )        | 0.736 ( $\pm 0.00$ )        | 0.703 ( $\pm 0.00$ )        | 0.555 ( $\pm 0.00$ ) | 0.730 ( $\pm 0.00$ )        | <b>0.812</b> ( $\pm 0.00$ ) |
| 0.90  | 0.377 ( $\pm 0.00$ ) | 0.280 ( $\pm 0.00$ ) | 0.503 ( $\pm 0.00$ )        | 0.680 ( $\pm 0.00$ )        | 0.650 ( $\pm 0.00$ )        | 0.420 ( $\pm 0.00$ ) | 0.739 ( $\pm 0.00$ )        | <b>0.742</b> ( $\pm 0.00$ ) |
| 0.99  | 0.272 ( $\pm 0.00$ ) | 0.249 ( $\pm 0.00$ ) | 0.241 ( $\pm 0.00$ )        | <b>0.384</b> ( $\pm 0.00$ ) | 0.241 ( $\pm 0.00$ )        | 0.241 ( $\pm 0.00$ ) | 0.241 ( $\pm 0.00$ )        | 0.370 ( $\pm 0.00$ )        |

Table 38: F1 scores for TADPOLE under mechanism *LD-MCAR* and varying  $\mu$ 

| $\mu$ | GOODIE                      | GSPN                 | FairAC               | FP                   | GNNmi                       | GCNmf                | PCFI                 | GNNmim                      |
|-------|-----------------------------|----------------------|----------------------|----------------------|-----------------------------|----------------------|----------------------|-----------------------------|
| 0.00  | 0.804 ( $\pm 0.00$ )        | 0.648 ( $\pm 0.01$ ) | 0.790 ( $\pm 0.00$ ) | 0.806 ( $\pm 0.00$ ) | <b>0.832</b> ( $\pm 0.02$ ) | 0.786 ( $\pm 0.00$ ) | 0.792 ( $\pm 0.00$ ) | 0.831 ( $\pm 0.04$ )        |
| 0.10  | 0.786 ( $\pm 0.00$ )        | 0.550 ( $\pm 0.00$ ) | 0.765 ( $\pm 0.00$ ) | 0.760 ( $\pm 0.00$ ) | 0.793 ( $\pm 0.00$ )        | 0.789 ( $\pm 0.00$ ) | 0.785 ( $\pm 0.00$ ) | <b>0.815</b> ( $\pm 0.00$ ) |
| 0.20  | 0.785 ( $\pm 0.00$ )        | 0.462 ( $\pm 0.00$ ) | 0.758 ( $\pm 0.00$ ) | 0.777 ( $\pm 0.00$ ) | 0.786 ( $\pm 0.00$ )        | 0.763 ( $\pm 0.00$ ) | 0.804 ( $\pm 0.00$ ) | <b>0.806</b> ( $\pm 0.00$ ) |
| 0.30  | 0.654 ( $\pm 0.00$ )        | 0.517 ( $\pm 0.00$ ) | 0.766 ( $\pm 0.00$ ) | 0.788 ( $\pm 0.00$ ) | 0.784 ( $\pm 0.00$ )        | 0.779 ( $\pm 0.00$ ) | 0.782 ( $\pm 0.00$ ) | <b>0.800</b> ( $\pm 0.00$ ) |
| 0.40  | 0.685 ( $\pm 0.00$ )        | 0.550 ( $\pm 0.00$ ) | 0.780 ( $\pm 0.00$ ) | 0.764 ( $\pm 0.00$ ) | 0.780 ( $\pm 0.00$ )        | 0.779 ( $\pm 0.00$ ) | 0.774 ( $\pm 0.00$ ) | <b>0.780</b> ( $\pm 0.00$ ) |
| 0.50  | 0.778 ( $\pm 0.00$ )        | 0.558 ( $\pm 0.00$ ) | 0.700 ( $\pm 0.00$ ) | 0.728 ( $\pm 0.00$ ) | 0.776 ( $\pm 0.00$ )        | 0.746 ( $\pm 0.00$ ) | 0.731 ( $\pm 0.00$ ) | <b>0.785</b> ( $\pm 0.00$ ) |
| 0.60  | <b>0.783</b> ( $\pm 0.00$ ) | 0.508 ( $\pm 0.00$ ) | 0.731 ( $\pm 0.00$ ) | 0.708 ( $\pm 0.00$ ) | 0.729 ( $\pm 0.00$ )        | 0.760 ( $\pm 0.00$ ) | 0.714 ( $\pm 0.00$ ) | 0.745 ( $\pm 0.00$ )        |
| 0.70  | <b>0.725</b> ( $\pm 0.00$ ) | 0.545 ( $\pm 0.00$ ) | 0.684 ( $\pm 0.00$ ) | 0.638 ( $\pm 0.00$ ) | 0.663 ( $\pm 0.00$ )        | 0.704 ( $\pm 0.00$ ) | 0.710 ( $\pm 0.00$ ) | 0.722 ( $\pm 0.00$ )        |
| 0.80  | <b>0.656</b> ( $\pm 0.00$ ) | 0.442 ( $\pm 0.00$ ) | 0.576 ( $\pm 0.00$ ) | 0.391 ( $\pm 0.00$ ) | 0.442 ( $\pm 0.00$ )        | 0.543 ( $\pm 0.00$ ) | 0.419 ( $\pm 0.00$ ) | 0.615 ( $\pm 0.00$ )        |
| 0.90  | <b>0.704</b> ( $\pm 0.00$ ) | 0.419 ( $\pm 0.00$ ) | 0.241 ( $\pm 0.00$ ) | 0.348 ( $\pm 0.00$ ) | 0.361 ( $\pm 0.00$ )        | 0.337 ( $\pm 0.00$ ) | 0.292 ( $\pm 0.00$ ) | 0.409 ( $\pm 0.00$ )        |
| 0.99  | <b>0.687</b> ( $\pm 0.00$ ) | 0.402 ( $\pm 0.00$ ) | 0.241 ( $\pm 0.00$ ) | 0.348 ( $\pm 0.00$ ) | 0.361 ( $\pm 0.00$ )        | 0.337 ( $\pm 0.00$ ) | 0.292 ( $\pm 0.00$ ) | 0.409 ( $\pm 0.00$ )        |

Table 39: F1 scores for TADPOLE under mechanism *FD-MNAR* and varying  $\mu$ 

| $\mu$ | GOODIE               | GSPN                 | FairAC                      | FP                          | GNNmi                       | GCNmf                       | PCFI                        | GNNmim                      |
|-------|----------------------|----------------------|-----------------------------|-----------------------------|-----------------------------|-----------------------------|-----------------------------|-----------------------------|
| 0.00  | 0.804 ( $\pm 0.00$ ) | 0.648 ( $\pm 0.01$ ) | 0.790 ( $\pm 0.00$ )        | 0.806 ( $\pm 0.00$ )        | <b>0.832</b> ( $\pm 0.02$ ) | 0.786 ( $\pm 0.00$ )        | 0.792 ( $\pm 0.00$ )        | 0.831 ( $\pm 0.04$ )        |
| 0.10  | 0.546 ( $\pm 0.07$ ) | 0.643 ( $\pm 0.01$ ) | 0.801 ( $\pm 0.01$ )        | 0.797 ( $\pm 0.01$ )        | 0.822 ( $\pm 0.02$ )        | 0.830 ( $\pm 0.04$ )        | 0.838 ( $\pm 0.03$ )        | <b>0.846</b> ( $\pm 0.04$ ) |
| 0.20  | 0.531 ( $\pm 0.11$ ) | 0.624 ( $\pm 0.05$ ) | 0.793 ( $\pm 0.04$ )        | <b>0.836</b> ( $\pm 0.01$ ) | 0.810 ( $\pm 0.01$ )        | 0.832 ( $\pm 0.02$ )        | 0.827 ( $\pm 0.01$ )        | 0.796 ( $\pm 0.00$ )        |
| 0.30  | 0.573 ( $\pm 0.12$ ) | 0.580 ( $\pm 0.04$ ) | 0.804 ( $\pm 0.05$ )        | 0.811 ( $\pm 0.03$ )        | 0.806 ( $\pm 0.04$ )        | 0.829 ( $\pm 0.04$ )        | <b>0.831</b> ( $\pm 0.02$ ) | 0.828 ( $\pm 0.03$ )        |
| 0.40  | 0.562 ( $\pm 0.09$ ) | 0.615 ( $\pm 0.03$ ) | 0.751 ( $\pm 0.03$ )        | 0.803 ( $\pm 0.04$ )        | 0.793 ( $\pm 0.04$ )        | <b>0.811</b> ( $\pm 0.02$ ) | 0.802 ( $\pm 0.03$ )        | 0.781 ( $\pm 0.02$ )        |
| 0.50  | 0.673 ( $\pm 0.04$ ) | 0.646 ( $\pm 0.07$ ) | 0.793 ( $\pm 0.02$ )        | 0.789 ( $\pm 0.02$ )        | 0.796 ( $\pm 0.05$ )        | 0.780 ( $\pm 0.01$ )        | <b>0.815</b> ( $\pm 0.03$ ) | 0.784 ( $\pm 0.03$ )        |
| 0.60  | 0.529 ( $\pm 0.09$ ) | 0.633 ( $\pm 0.06$ ) | 0.722 ( $\pm 0.07$ )        | 0.805 ( $\pm 0.04$ )        | 0.785 ( $\pm 0.05$ )        | 0.758 ( $\pm 0.02$ )        | <b>0.810</b> ( $\pm 0.03$ ) | 0.795 ( $\pm 0.03$ )        |
| 0.70  | 0.634 ( $\pm 0.05$ ) | 0.571 ( $\pm 0.04$ ) | <b>0.804</b> ( $\pm 0.03$ ) | 0.795 ( $\pm 0.04$ )        | 0.746 ( $\pm 0.06$ )        | 0.720 ( $\pm 0.06$ )        | 0.795 ( $\pm 0.05$ )        | 0.780 ( $\pm 0.03$ )        |
| 0.80  | 0.378 ( $\pm 0.10$ ) | 0.590 ( $\pm 0.06$ ) | 0.612 ( $\pm 0.14$ )        | 0.785 ( $\pm 0.02$ )        | 0.692 ( $\pm 0.05$ )        | 0.708 ( $\pm 0.02$ )        | <b>0.797</b> ( $\pm 0.03$ ) | 0.765 ( $\pm 0.00$ )        |
| 0.90  | 0.309 ( $\pm 0.10$ ) | 0.597 ( $\pm 0.01$ ) | 0.241 ( $\pm 0.00$ )        | 0.771 ( $\pm 0.03$ )        | 0.663 ( $\pm 0.05$ )        | 0.719 ( $\pm 0.01$ )        | <b>0.787</b> ( $\pm 0.02$ ) | 0.777 ( $\pm 0.06$ )        |
| 0.99  | 0.241 ( $\pm 0.00$ ) | 0.600 ( $\pm 0.05$ ) | 0.241 ( $\pm 0.00$ )        | 0.736 ( $\pm 0.03$ )        | 0.241 ( $\pm 0.00$ )        | 0.584 ( $\pm 0.05$ )        | 0.241 ( $\pm 0.00$ )        | <b>0.794</b> ( $\pm 0.04$ ) |

Table 40: F1 scores for TADPOLE under mechanism *CD-MNAR* and varying  $\mu$ 

| $\mu$ | GOODIE               | GSPN                 | FairAC               | FP                   | GNNmi                       | GCNmf                | PCFI                        | GNNmim                      |
|-------|----------------------|----------------------|----------------------|----------------------|-----------------------------|----------------------|-----------------------------|-----------------------------|
| 0.00  | 0.804 ( $\pm 0.00$ ) | 0.648 ( $\pm 0.01$ ) | 0.790 ( $\pm 0.00$ ) | 0.806 ( $\pm 0.00$ ) | <b>0.832</b> ( $\pm 0.02$ ) | 0.786 ( $\pm 0.00$ ) | 0.792 ( $\pm 0.00$ )        | 0.809 ( $\pm 0.00$ )        |
| 0.10  | 0.553 ( $\pm 0.06$ ) | 0.534 ( $\pm 0.09$ ) | 0.793 ( $\pm 0.05$ ) | 0.813 ( $\pm 0.03$ ) | <b>0.829</b> ( $\pm 0.04$ ) | 0.792 ( $\pm 0.03$ ) | 0.806 ( $\pm 0.03$ )        | 0.803 ( $\pm 0.01$ )        |
| 0.20  | 0.485 ( $\pm 0.06$ ) | 0.515 ( $\pm 0.04$ ) | 0.804 ( $\pm 0.03$ ) | 0.812 ( $\pm 0.03$ ) | <b>0.832</b> ( $\pm 0.03$ ) | 0.810 ( $\pm 0.02$ ) | 0.806 ( $\pm 0.02$ )        | 0.815 ( $\pm 0.02$ )        |
| 0.30  | 0.441 ( $\pm 0.02$ ) | 0.584 ( $\pm 0.06$ ) | 0.805 ( $\pm 0.03$ ) | 0.785 ( $\pm 0.02$ ) | 0.811 ( $\pm 0.03$ )        | 0.786 ( $\pm 0.02$ ) | 0.812 ( $\pm 0.02$ )        | <b>0.827</b> ( $\pm 0.03$ ) |
| 0.40  | 0.502 ( $\pm 0.07$ ) | 0.671 ( $\pm 0.03$ ) | 0.828 ( $\pm 0.01$ ) | 0.818 ( $\pm 0.03$ ) | 0.808 ( $\pm 0.02$ )        | 0.793 ( $\pm 0.02$ ) | 0.814 ( $\pm 0.03$ )        | <b>0.830</b> ( $\pm 0.01$ ) |
| 0.50  | 0.448 ( $\pm 0.02$ ) | 0.621 ( $\pm 0.04$ ) | 0.784 ( $\pm 0.02$ ) | 0.804 ( $\pm 0.04$ ) | 0.799 ( $\pm 0.04$ )        | 0.756 ( $\pm 0.03$ ) | 0.803 ( $\pm 0.05$ )        | <b>0.828</b> ( $\pm 0.04$ ) |
| 0.60  | 0.457 ( $\pm 0.01$ ) | 0.529 ( $\pm 0.03$ ) | 0.791 ( $\pm 0.01$ ) | 0.781 ( $\pm 0.03$ ) | <b>0.803</b> ( $\pm 0.03$ ) | 0.710 ( $\pm 0.07$ ) | 0.797 ( $\pm 0.03$ )        | 0.792 ( $\pm 0.03$ )        |
| 0.70  | 0.485 ( $\pm 0.07$ ) | 0.590 ( $\pm 0.09$ ) | 0.639 ( $\pm 0.29$ ) | 0.797 ( $\pm 0.05$ ) | 0.787 ( $\pm 0.04$ )        | 0.710 ( $\pm 0.05$ ) | <b>0.822</b> ( $\pm 0.02$ ) | 0.818 ( $\pm 0.01$ )        |
| 0.80  | 0.376 ( $\pm 0.10$ ) | 0.605 ( $\pm 0.04$ ) | 0.434 ( $\pm 0.27$ ) | 0.785 ( $\pm 0.05$ ) | 0.767 ( $\pm 0.09$ )        | 0.744 ( $\pm 0.01$ ) | 0.798 ( $\pm 0.02$ )        | <b>0.800</b> ( $\pm 0.02$ ) |
| 0.90  | 0.362 ( $\pm 0.09$ ) | 0.563 ( $\pm 0.03$ ) | 0.241 ( $\pm 0.00$ ) | 0.788 ( $\pm 0.01$ ) | 0.730 ( $\pm 0.08$ )        | 0.689 ( $\pm 0.05$ ) | 0.776 ( $\pm 0.06$ )        | <b>0.803</b> ( $\pm 0.05$ ) |
| 0.99  | 0.324 ( $\pm 0.12$ ) | 0.547 ( $\pm 0.08$ ) | 0.241 ( $\pm 0.00$ ) | 0.255 ( $\pm 0.02$ ) | 0.241 ( $\pm 0.00$ )        | 0.348 ( $\pm 0.05$ ) | 0.241 ( $\pm 0.00$ )        | <b>0.652</b> ( $\pm 0.04$ ) |

## G COMPLETE RESULT TABLES – R2 REGIME

This appendix complements the analysis of Research Question 3 (Section 4). It reports the complete set of results for the R2 regime, where training and test data are subject to different missingness mechanisms. We include both numerical tables (F1-score mean  $\pm$  std over 5 runs) and extended visualizations across all models and datasets.

### G.1 NUMERICAL RESULTS

Table 41 reports the full F1-scores for all models, datasets, and shift configurations considered in the R2 regime.

Table 41: F1 (mean  $\pm$  std over 5 runs). Setup: **R2** missingness distribution shift, where training data are subject to either *FD-MNAR* or *CD-MNAR*, while test data have either no missingness, 25% or 50% of *U-MCAR*

| Task      | Train mech.    | $\mu$ Test | GOODIE             | GSPN               | FairAC                              | GCNmf              | PCFI                                | FP                                  | GNNmi              | GNNmim                              |
|-----------|----------------|------------|--------------------|--------------------|-------------------------------------|--------------------|-------------------------------------|-------------------------------------|--------------------|-------------------------------------|
| SYNTHETIC | <i>FD-MNAR</i> | 0          | 0.50 ( $\pm$ 0.15) | 0.68 ( $\pm$ 0.01) | 0.69 ( $\pm$ 0.05)                  | 0.81 ( $\pm$ 0.01) | 0.79 ( $\pm$ 0.02)                  | 0.80 ( $\pm$ 0.01)                  | 0.80 ( $\pm$ 0.01) | <b>0.82 (<math>\pm</math> 0.01)</b> |
|           | <i>FD-MNAR</i> | 0.25       | 0.47 ( $\pm$ 0.13) | 0.64 ( $\pm$ 0.03) | 0.69 ( $\pm$ 0.04)                  | 0.74 ( $\pm$ 0.03) | 0.75 ( $\pm$ 0.03)                  | 0.76 ( $\pm$ 0.03)                  | 0.75 ( $\pm$ 0.03) | <b>0.77 (<math>\pm</math> 0.03)</b> |
|           | <i>FD-MNAR</i> | 0.50       | 0.47 ( $\pm$ 0.13) | 0.64 ( $\pm$ 0.02) | 0.65 ( $\pm$ 0.04)                  | 0.71 ( $\pm$ 0.03) | 0.73 ( $\pm$ 0.02)                  | 0.71 ( $\pm$ 0.02)                  | 0.71 ( $\pm$ 0.02) | 0.73 ( $\pm$ 0.02)                  |
|           | <i>CD-MNAR</i> | 0          | 0.71 ( $\pm$ 0.07) | 0.70 ( $\pm$ 0.03) | 0.70 ( $\pm$ 0.05)                  | 0.80 ( $\pm$ 0.04) | 0.81 ( $\pm$ 0.02)                  | 0.80 ( $\pm$ 0.02)                  | 0.78 ( $\pm$ 0.02) | <b>0.85 (<math>\pm</math> 0.04)</b> |
|           | <i>CD-MNAR</i> | 0.25       | 0.66 ( $\pm$ 0.05) | 0.68 ( $\pm$ 0.05) | 0.68 ( $\pm$ 0.03)                  | 0.75 ( $\pm$ 0.06) | 0.78 ( $\pm$ 0.04)                  | 0.77 ( $\pm$ 0.04)                  | 0.77 ( $\pm$ 0.02) | <b>0.80 (<math>\pm</math> 0.03)</b> |
|           | <i>CD-MNAR</i> | 0.50       | 0.56 ( $\pm$ 0.10) | 0.64 ( $\pm$ 0.04) | 0.65 ( $\pm$ 0.01)                  | 0.73 ( $\pm$ 0.02) | 0.72 ( $\pm$ 0.03)                  | 0.72 ( $\pm$ 0.05)                  | 0.72 ( $\pm$ 0.01) | <b>0.75 (<math>\pm</math> 0.03)</b> |
| AIR       | <i>FD-MNAR</i> | 0          | 0.50 ( $\pm$ 0.14) | 0.33 ( $\pm$ 0.04) | 0.66 ( $\pm$ 0.07)                  | 0.83 ( $\pm$ 0.05) | <b>0.88 (<math>\pm</math> 0.01)</b> | 0.86 ( $\pm$ 0.03)                  | 0.86 ( $\pm$ 0.03) | 0.87 ( $\pm$ 0.02)                  |
|           | <i>FD-MNAR</i> | 0.25       | 0.51 ( $\pm$ 0.12) | 0.42 ( $\pm$ 0.04) | 0.65 ( $\pm$ 0.08)                  | 0.68 ( $\pm$ 0.05) | 0.83 ( $\pm$ 0.05)                  | 0.81 ( $\pm$ 0.02)                  | 0.81 ( $\pm$ 0.01) | <b>0.85 (<math>\pm</math> 0.01)</b> |
|           | <i>FD-MNAR</i> | 0.50       | 0.52 ( $\pm$ 0.11) | 0.55 ( $\pm$ 0.03) | 0.70 ( $\pm$ 0.03)                  | 0.71 ( $\pm$ 0.03) | <b>0.80 (<math>\pm</math> 0.07)</b> | 0.79 ( $\pm$ 0.06)                  | 0.79 ( $\pm$ 0.05) | 0.80 ( $\pm$ 0.05)                  |
|           | <i>CD-MNAR</i> | 0          | 0.56 ( $\pm$ 0.16) | 0.35 ( $\pm$ 0.02) | 0.65 ( $\pm$ 0.08)                  | 0.60 ( $\pm$ 0.2)  | <b>0.88 (<math>\pm</math> 0.01)</b> | 0.71 ( $\pm$ 0.07)                  | 0.86 ( $\pm$ 0.06) | 0.85 ( $\pm$ 0.00)                  |
|           | <i>CD-MNAR</i> | 0.25       | 0.56 ( $\pm$ 0.16) | 0.45 ( $\pm$ 0.5)  | 0.70 ( $\pm$ 0.05)                  | 0.70 ( $\pm$ 0.05) | 0.84 ( $\pm$ 0.05)                  | 0.75 ( $\pm$ 0.05)                  | 0.84 ( $\pm$ 0.04) | <b>0.84 (<math>\pm</math> 0.06)</b> |
|           | <i>CD-MNAR</i> | 0.50       | 0.62 ( $\pm$ 0.07) | 0.47 ( $\pm$ 0.04) | 0.68 ( $\pm$ 0.07)                  | 0.70 ( $\pm$ 0.02) | <b>0.80 (<math>\pm</math> 0.05)</b> | 0.72 ( $\pm$ 0.03)                  | 0.76 ( $\pm$ 0.05) | 0.76 ( $\pm$ 0.02)                  |
| ELECTRIC  | <i>FD-MNAR</i> | 0          | 0.45 ( $\pm$ 0.11) | 0.67 ( $\pm$ 0.11) | <b>0.92 (<math>\pm</math> 0.02)</b> | 0.88 ( $\pm$ 0.12) | 0.69 ( $\pm$ 0.00)                  | 0.76 ( $\pm$ 0.03)                  | 0.80 ( $\pm$ 0.02) | 0.92 ( $\pm$ 0.01)                  |
|           | <i>FD-MNAR</i> | 0.25       | 0.53 ( $\pm$ 0.10) | 0.68 ( $\pm$ 0.06) | <b>0.89 (<math>\pm</math> 0.00)</b> | 0.80 ( $\pm$ 0.02) | 0.73 ( $\pm$ 0.03)                  | 0.69 ( $\pm$ 0.03)                  | 0.74 ( $\pm$ 0.02) | 0.87 ( $\pm$ 0.01)                  |
|           | <i>FD-MNAR</i> | 0.50       | 0.50 ( $\pm$ 0.10) | 0.68 ( $\pm$ 0.01) | <b>0.90 (<math>\pm</math> 0.02)</b> | 0.83 ( $\pm$ 0.01) | 0.75 ( $\pm$ 0.03)                  | 0.62 ( $\pm$ 0.02)                  | 0.66 ( $\pm$ 0.03) | 0.82 ( $\pm$ 0.02)                  |
|           | <i>CD-MNAR</i> | 0          | 0.52 ( $\pm$ 0.10) | 0.78 ( $\pm$ 0.04) | 0.92 ( $\pm$ 0.02)                  | 0.86 ( $\pm$ 0.01) | 0.88 ( $\pm$ 0.01)                  | 0.83 ( $\pm$ 0.05)                  | 0.81 ( $\pm$ 0.01) | <b>0.94 (<math>\pm</math> 0.00)</b> |
|           | <i>CD-MNAR</i> | 0.25       | 0.50 ( $\pm$ 0.10) | 0.78 ( $\pm$ 0.01) | <b>0.88 (<math>\pm</math> 0.01)</b> | 0.86 ( $\pm$ 0.02) | 0.85 ( $\pm$ 0.02)                  | 0.74 ( $\pm$ 0.04)                  | 0.73 ( $\pm$ 0.03) | 0.85 ( $\pm$ 0.03)                  |
|           | <i>CD-MNAR</i> | 0.50       | 0.49 ( $\pm$ 0.12) | 0.70 ( $\pm$ 0.02) | <b>0.87 (<math>\pm</math> 0.02)</b> | 0.82 ( $\pm$ 0.03) | 0.81 ( $\pm$ 0.00)                  | 0.66 ( $\pm$ 0.01)                  | 0.70 ( $\pm$ 0.03) | 0.83 ( $\pm$ 0.02)                  |
| TADPOLE   | <i>FD-MNAR</i> | 0          | 0.52 ( $\pm$ 0.07) | 0.53 ( $\pm$ 0.00) | 0.75 ( $\pm$ 0.03)                  | 0.74 ( $\pm$ 0.05) | 0.79 ( $\pm$ 0.00)                  | 0.77 ( $\pm$ 0.00)                  | 0.76 ( $\pm$ 0.01) | <b>0.83 (<math>\pm</math> 0.02)</b> |
|           | <i>FD-MNAR</i> | 0.25       | 0.48 ( $\pm$ 0.03) | 0.48 ( $\pm$ 0.02) | 0.77 ( $\pm$ 0.01)                  | 0.73 ( $\pm$ 0.01) | <b>0.82 (<math>\pm</math> 0.02)</b> | 0.78 ( $\pm$ 0.03)                  | 0.76 ( $\pm$ 0.03) | 0.81 ( $\pm$ 0.01)                  |
|           | <i>FD-MNAR</i> | 0.50       | 0.48 ( $\pm$ 0.04) | 0.53 ( $\pm$ 0.02) | 0.79 ( $\pm$ 0.02)                  | 0.71 ( $\pm$ 0.04) | 0.78 ( $\pm$ 0.02)                  | 0.74 ( $\pm$ 0.02)                  | 0.73 ( $\pm$ 0.03) | <b>0.82 (<math>\pm</math> 0.03)</b> |
|           | <i>CD-MNAR</i> | 0          | 0.60 ( $\pm$ 0.02) | 0.26 ( $\pm$ 0.02) | 0.79 ( $\pm$ 0.05)                  | 0.75 ( $\pm$ 0.04) | <b>0.80 (<math>\pm</math> 0.04)</b> | 0.80 ( $\pm$ 0.03)                  | 0.79 ( $\pm$ 0.05) | 0.79 ( $\pm$ 0.06)                  |
|           | <i>CD-MNAR</i> | 0.25       | 0.47 ( $\pm$ 0.09) | 0.52 ( $\pm$ 0.02) | 0.82 ( $\pm$ 0.05)                  | 0.78 ( $\pm$ 0.01) | <b>0.80 (<math>\pm</math> 0.04)</b> | <b>0.80 (<math>\pm</math> 0.04)</b> | 0.77 ( $\pm$ 0.04) | 0.75 ( $\pm$ 0.03)                  |
|           | <i>CD-MNAR</i> | 0.50       | 0.49 ( $\pm$ 0.07) | 0.62 ( $\pm$ 0.05) | 0.81 ( $\pm$ 0.03)                  | 0.75 ( $\pm$ 0.00) | 0.79 ( $\pm$ 0.01)                  | <b>0.82 (<math>\pm</math> 0.02)</b> | 0.76 ( $\pm$ 0.03) | 0.74 ( $\pm$ 0.02)                  |

### G.2 EXTENDED VISUALIZATIONS

In addition to Figure 3 in the main paper, Figures 6 and 7 report the full results for all models under both training mechanisms.

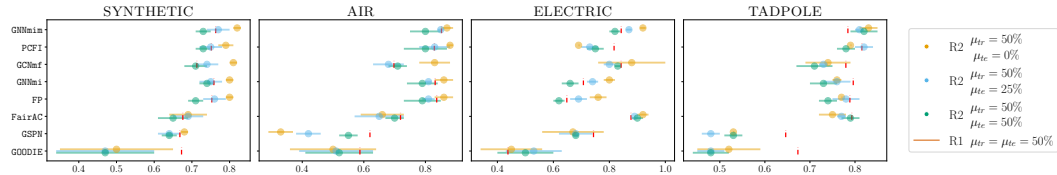

Figure 6: Full results for all models trained with *FD-MNAR* at  $\mu_{tr} = 50\%$ , tested on *U-MCAR* with  $\mu_{te} \in \{0\%, 25\%, 50\%\}$ . Each panel corresponds to one dataset; each row to one model. Reported values are mean  $\pm$  std over 5 runs.



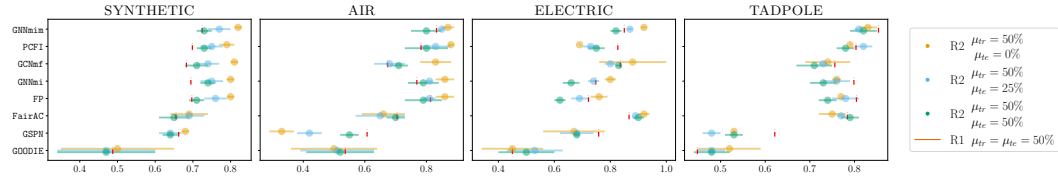

Figure 7: Full results for all models trained with *CD-MNAR* at  $\mu_{tr} = 50\%$ , tested on *U-MCAR* with  $\mu_{te} \in \{0\%, 25\%, 50\%\}$ . Same layout as Figure 6
